# Supplementary material
Source: PubMed Central journal article supplement (PMC5791048)
Supplement: np7b00732_si_001.pdf [file np7b00732_si_001.pdf]

## Supporting Information

Keikipukalides, Furanocembrane Diterpenes from the Antarctic Deep Sea Octocoral *Plumarella delicatissima*

Santana A.L. Thomas,<sup>†,‡,¶</sup> Jacqueline L. von Salm,<sup>†,‡,¶</sup> Shane Clark,<sup>†</sup> Steve Ferlita,<sup>†</sup> Prasanth Nemani,<sup>†</sup> Ala Azhari,<sup>§,‡</sup> Christopher A. Rice,<sup>§,‡</sup> Nerida G. Wilson,<sup>⊥</sup> Dennis E. Kyle<sup>§,‡</sup> and Bill J. Baker<sup>†,‡,\*</sup>

<sup>†</sup>Departments of Chemistry and <sup>§</sup>Global Health, <sup>‡</sup>Center for Drug Discovery and Innovation, University of South Florida, Tampa, FL 33620, United States and <sup>⊥</sup>Western Australia Museum and University of Western Australia Perth, Western Australia, Australia

|                                                                                                               |    |
|---------------------------------------------------------------------------------------------------------------|----|
| Figure S1. <sup>1</sup> H NMR spectrum of keikipukalide A ( <b>1</b> ) in CDCl <sub>3</sub> , 400 MHz .....   | 3  |
| Figure S2. <sup>13</sup> C NMR spectrum of keikipukalide A ( <b>1</b> ) in CDCl <sub>3</sub> , 100 MHz .....  | 4  |
| Figure S3. gHMBC of keikipukalide A ( <b>1</b> ) in CDCl <sub>3</sub> , 400 MHz .....                         | 5  |
| Figure S4. gHMBC of keikipukalide A ( <b>1</b> ) in CDCl <sub>3</sub> , 400 MHz .....                         | 6  |
| Figure S5. gCOSY of keikipukalide A ( <b>1</b> ) in CDCl <sub>3</sub> , 400 MHz.....                          | 7  |
| Figure S6. NOESY of keikipukalide A ( <b>1</b> ) in CDCl <sub>3</sub> , 500 MHz.....                          | 8  |
| Figure S7. <sup>1</sup> H NMR spectrum of keikipukalide B ( <b>2</b> ) in CDCl <sub>3</sub> , 400 MHz .....   | 9  |
| Figure S8. <sup>13</sup> C NMR spectrum of keikipukalide B ( <b>2</b> ) in CDCl <sub>3</sub> , 125 MHz .....  | 10 |
| Figure S9. gHSQC of keikipukalide B( <b>2</b> ) in CDCl <sub>3</sub> , 600 MHz.....                           | 11 |
| Figure S10. gHMBC of keikipukalide B ( <b>2</b> ) in CDCl <sub>3</sub> , 500 MHz.....                         | 12 |
| Figure S11. gCOSY of keikipukalide B ( <b>2</b> ) in CDCl <sub>3</sub> , 500 MHz.....                         | 13 |
| Figure S12. NOESY of keikipukalide B ( <b>2</b> ) in CDCl <sub>3</sub> , 400 MHz .....                        | 14 |
| Figure S13. <sup>1</sup> H NMR spectrum of keikipukalide C ( <b>3</b> ) in CDCl <sub>3</sub> , 400 MHz .....  | 15 |
| Figure S14. <sup>13</sup> C NMR spectrum of keikipukalide C ( <b>3</b> ) in CDCl <sub>3</sub> , 100 MHz ..... | 16 |
| Figure S15. gHMBC of keikipukalide C ( <b>3</b> ) in CDCl <sub>3</sub> , 400 MHz .....                        | 17 |
| Figure S16. gHMBC of keikipukalide C ( <b>3</b> ) in CDCl <sub>3</sub> , 400 MHz.....                         | 18 |
| Figure S17. gCOSY of keikipukalide C ( <b>3</b> ) in CDCl <sub>3</sub> , 400 MHz.....                         | 19 |
| Figure S18. NOESY of keikipukalide C ( <b>3</b> ) in CDCl <sub>3</sub> , 400 MHz .....                        | 20 |
| Figure S19. <sup>1</sup> H NMR spectrum of keikipukalide D ( <b>4</b> ) in CDCl <sub>3</sub> , 400 MHz .....  | 21 |

|                                                                                                                                     |    |
|-------------------------------------------------------------------------------------------------------------------------------------|----|
| Figure S20. $^{13}\text{C}$ NMR spectrum of keikipukalide D ( <b>4</b> ) in $\text{CDCl}_3$ , 100 MHz .....                         | 22 |
| Figure S21. gHMQC of keikipukalide D ( <b>4</b> ) in $\text{CDCl}_3$ , 400 MHz .....                                                | 23 |
| Figure S22. gHMBC of keikipukalide D ( <b>4</b> ) in $\text{CDCl}_3$ , 400 MHz .....                                                | 24 |
| Figure S23. gCOSY of keikipukalide D ( <b>4</b> ) in $\text{CDCl}_3$ , 500 MHz.....                                                 | 25 |
| Figure S24. NOESY of keikipukalide D ( <b>4</b> ) in $\text{CDCl}_3$ , 500 MHz.....                                                 | 26 |
| Figure S25. $^1\text{H}$ NMR spectrum of keikipukalide E ( <b>5</b> ) in $\text{CDCl}_3$ , 500 MHz.....                             | 27 |
| Figure S26. $^{13}\text{C}$ NMR spectrum of keikipukalide E ( <b>5</b> ) in $\text{CDCl}_3$ , 125 MHz.....                          | 28 |
| Figure S27. gHSQC of keikipukalide E ( <b>5</b> ) in $\text{CDCl}_3$ , 500 MHz.....                                                 | 29 |
| Figure S28. gHMBC of keikipukalide E ( <b>5</b> ) in $\text{CDCl}_3$ , 500 MHz.....                                                 | 30 |
| Figure S29. gCOSY of keikipukalide E ( <b>5</b> ) in $\text{CDCl}_3$ , 500 MHz.....                                                 | 31 |
| Figure S30. NOESY of keikipukalide E ( <b>5</b> ) in $\text{CDCl}_3$ , 500 MHz.....                                                 | 32 |
| Figure S31. Maximum Likelihood tree topology comparing our <i>Plumarella</i> msh1 sequences<br>with those available on Genbank..... | 33 |
| Table S1. Crystal data and structure refinement for keikipukalide A ( <b>1</b> ).....                                               | 34 |
| Table S2. Results Bijvoet-Pair Analysis and Bayesian Statistics for Keikipukalide A ( <b>1</b> ).....                               | 35 |
| Table S3. Crystal data and structure refinement for keikipukalide E ( <b>5</b> ).....                                               | 36 |
| Table S4. Results Bijvoet-Pair Analysis and Bayesian Statistics for Keikipukalide E ( <b>5</b> ).....                               | 37 |

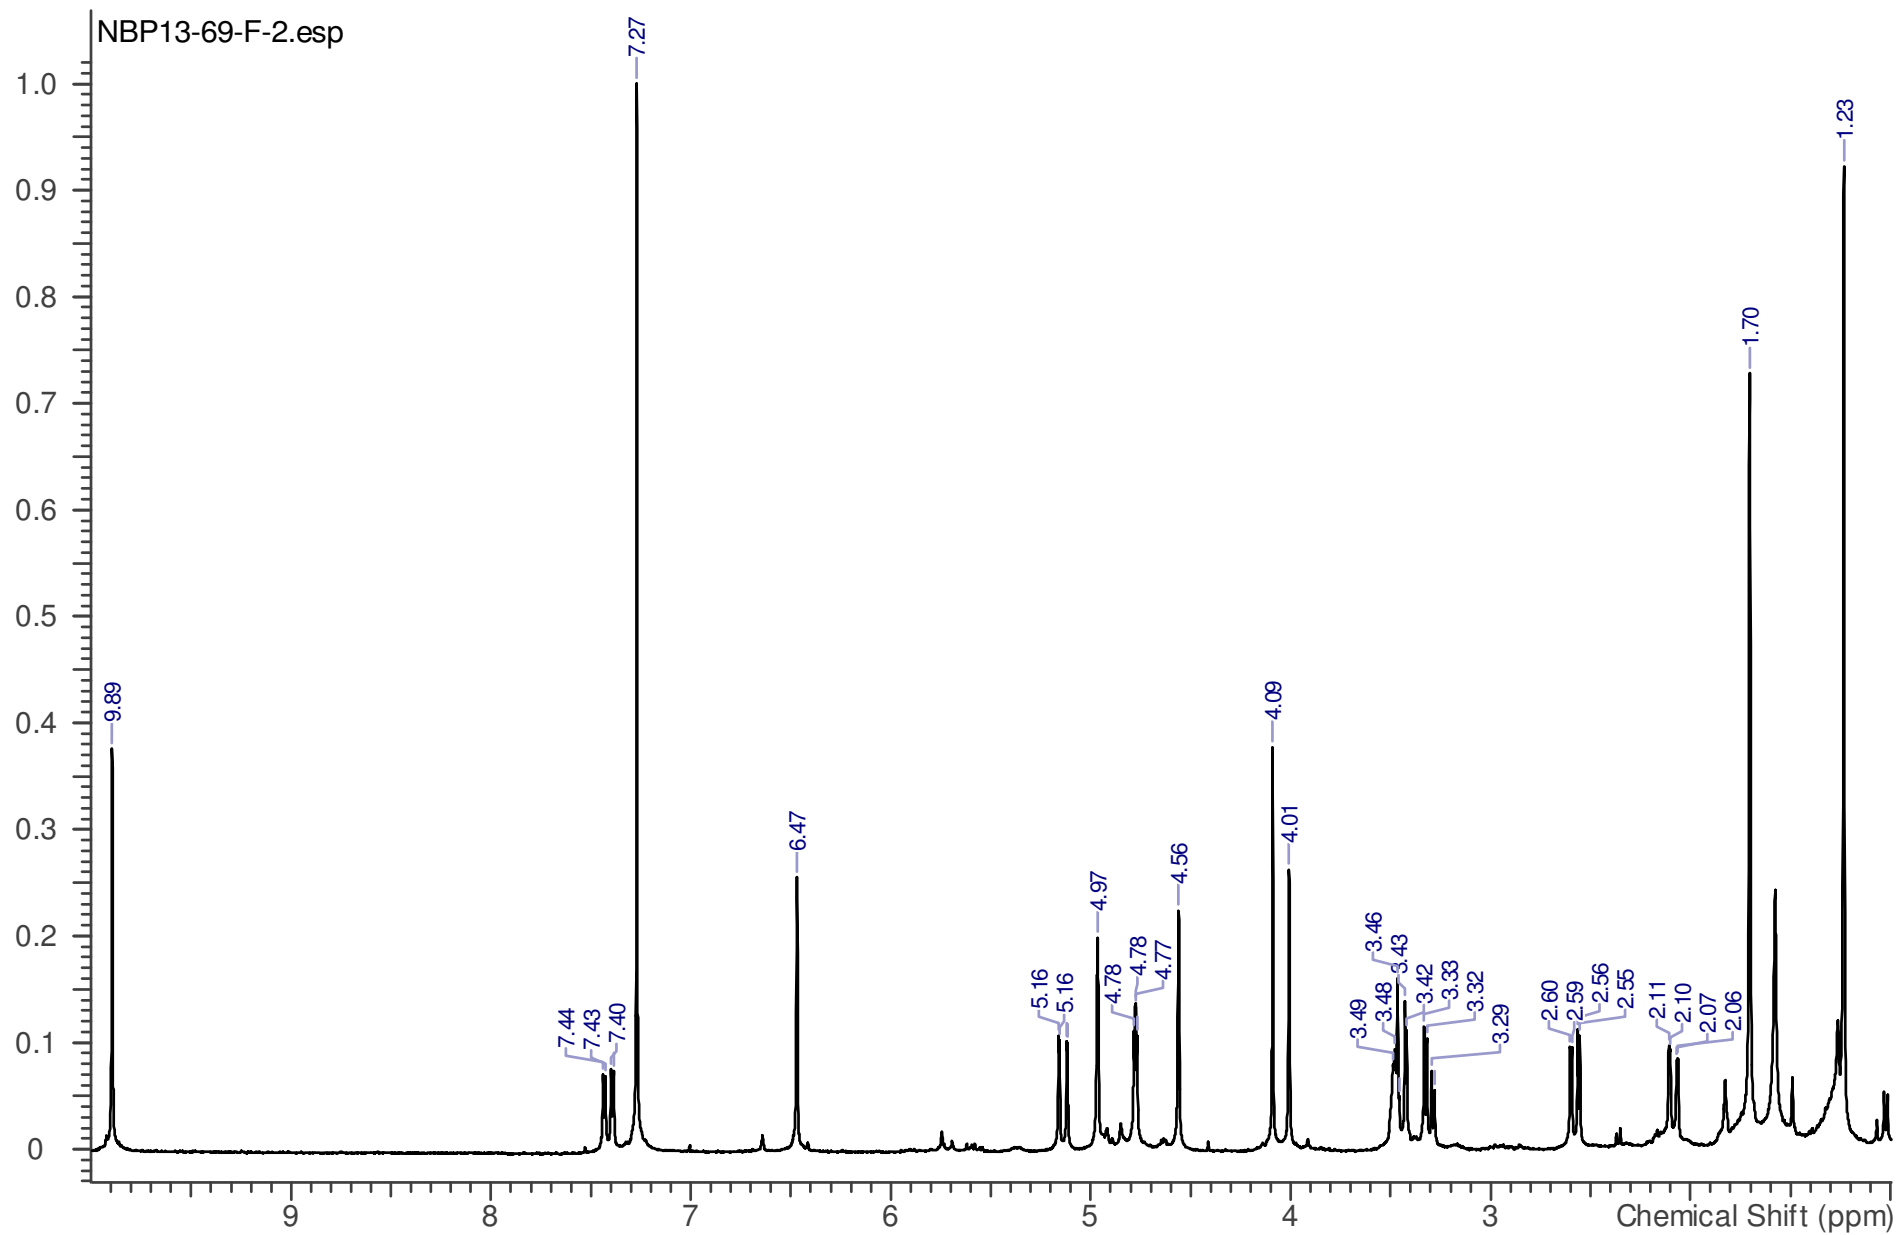

Figure S1.  $^1\text{H}$  NMR spectrum of keikipukalide A (**1**) in  $\text{CDCl}_3$ , 400 MHz

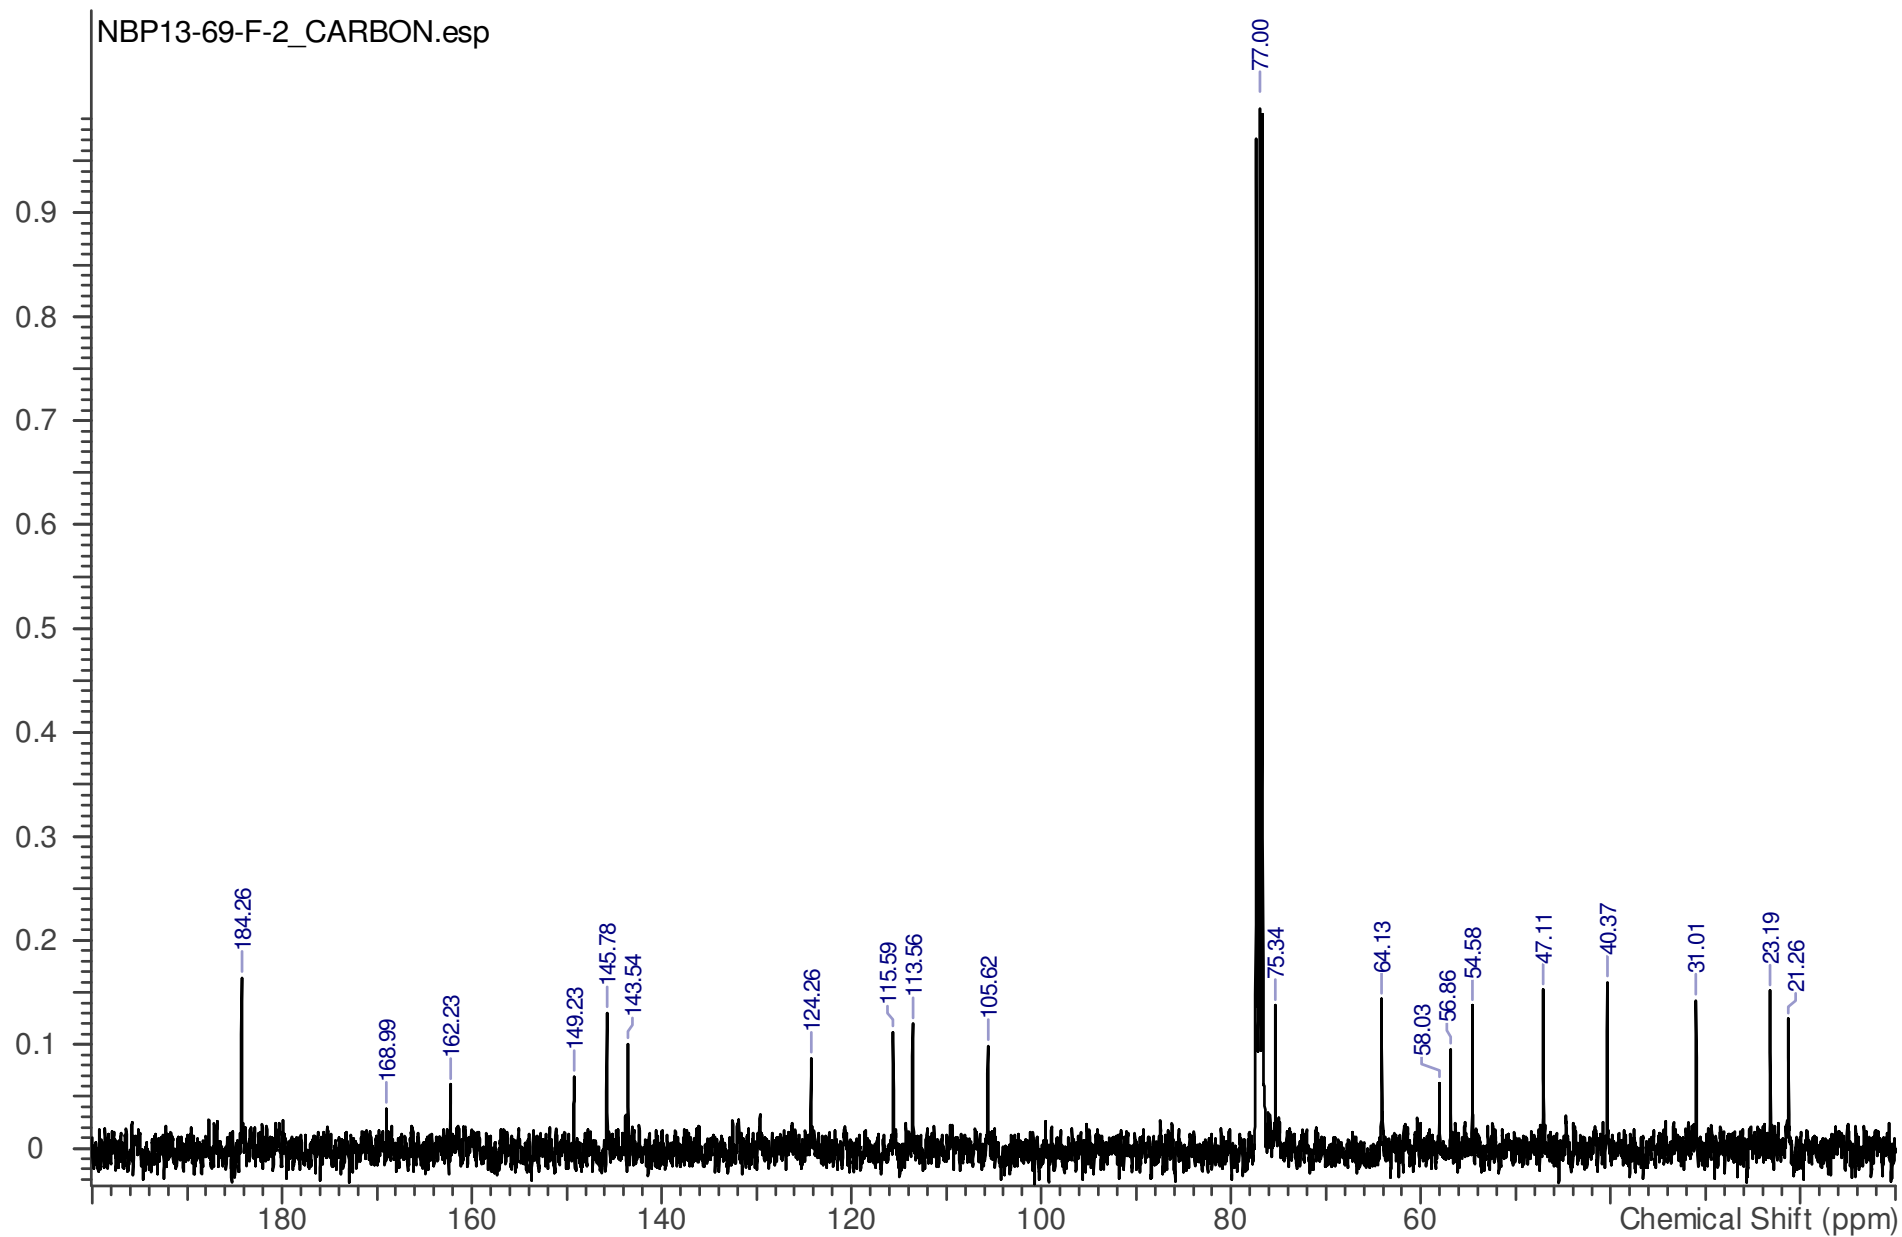

Figure S2.  $^{13}\text{C}$  NMR spectrum of keikipukalide A (**1**) in  $\text{CDCl}_3$ , 100 MHz

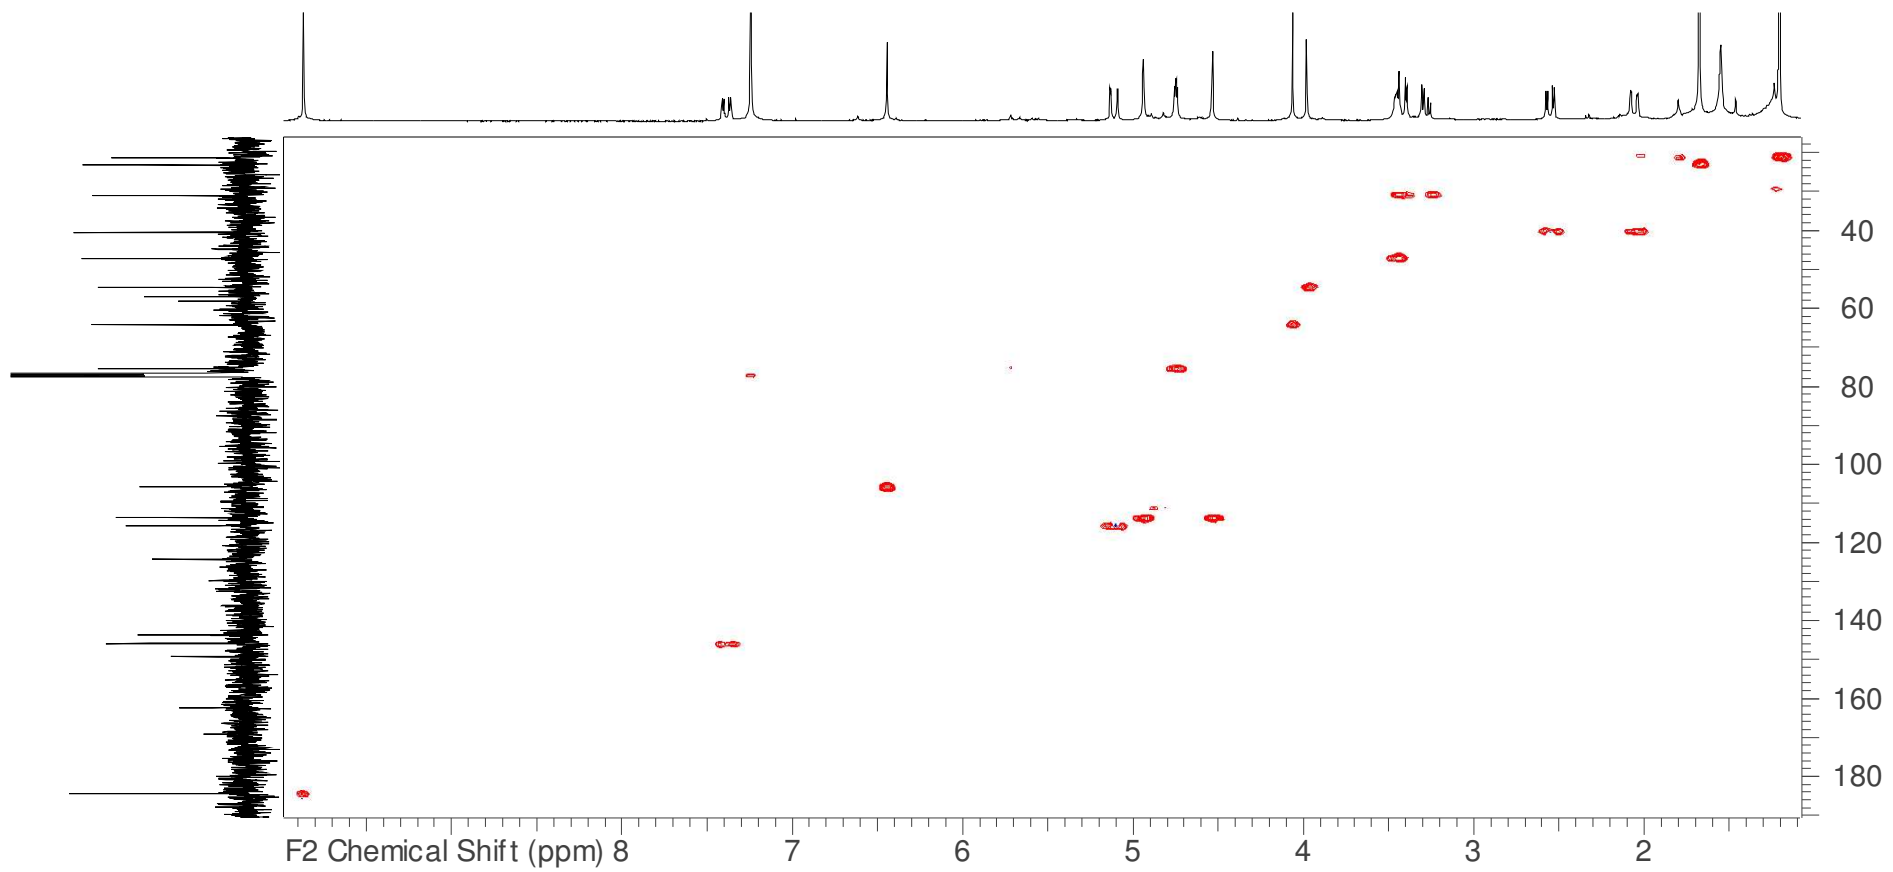

Figure S3. gHMQC of keikipukalide A (**1**) in CDCl<sub>3</sub>, 400 MHz

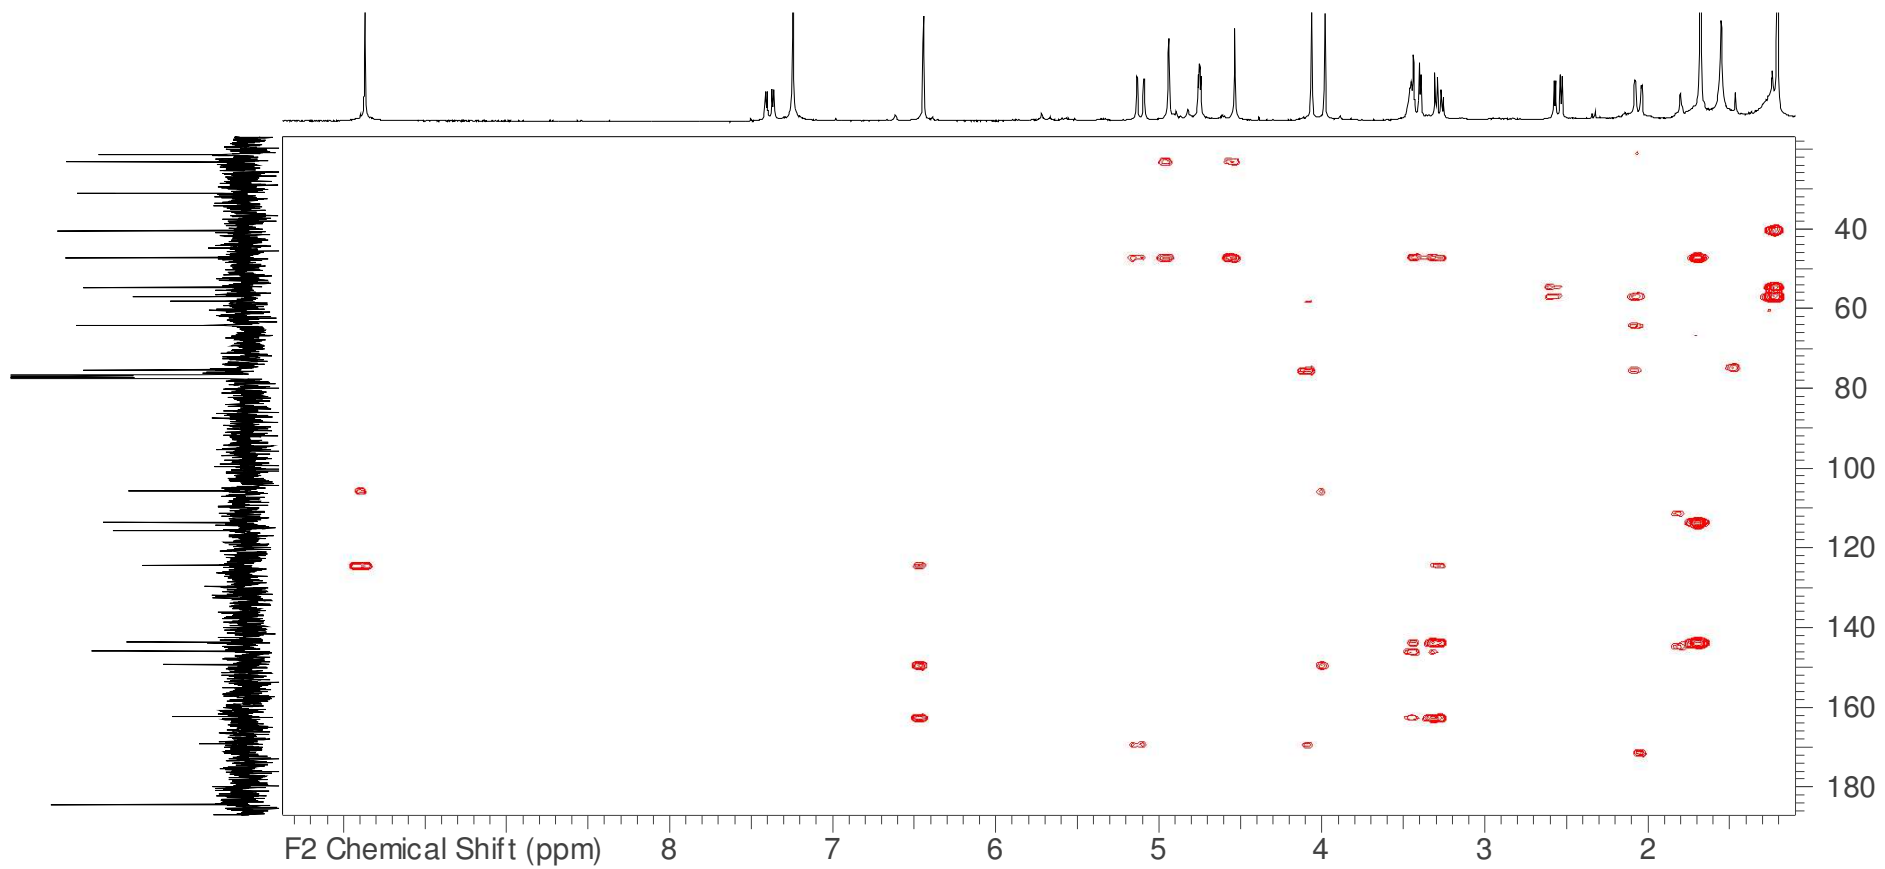

Figure S4. gHMBC of keikipukalide A (**1**) in CDCl<sub>3</sub>, 400 MHz

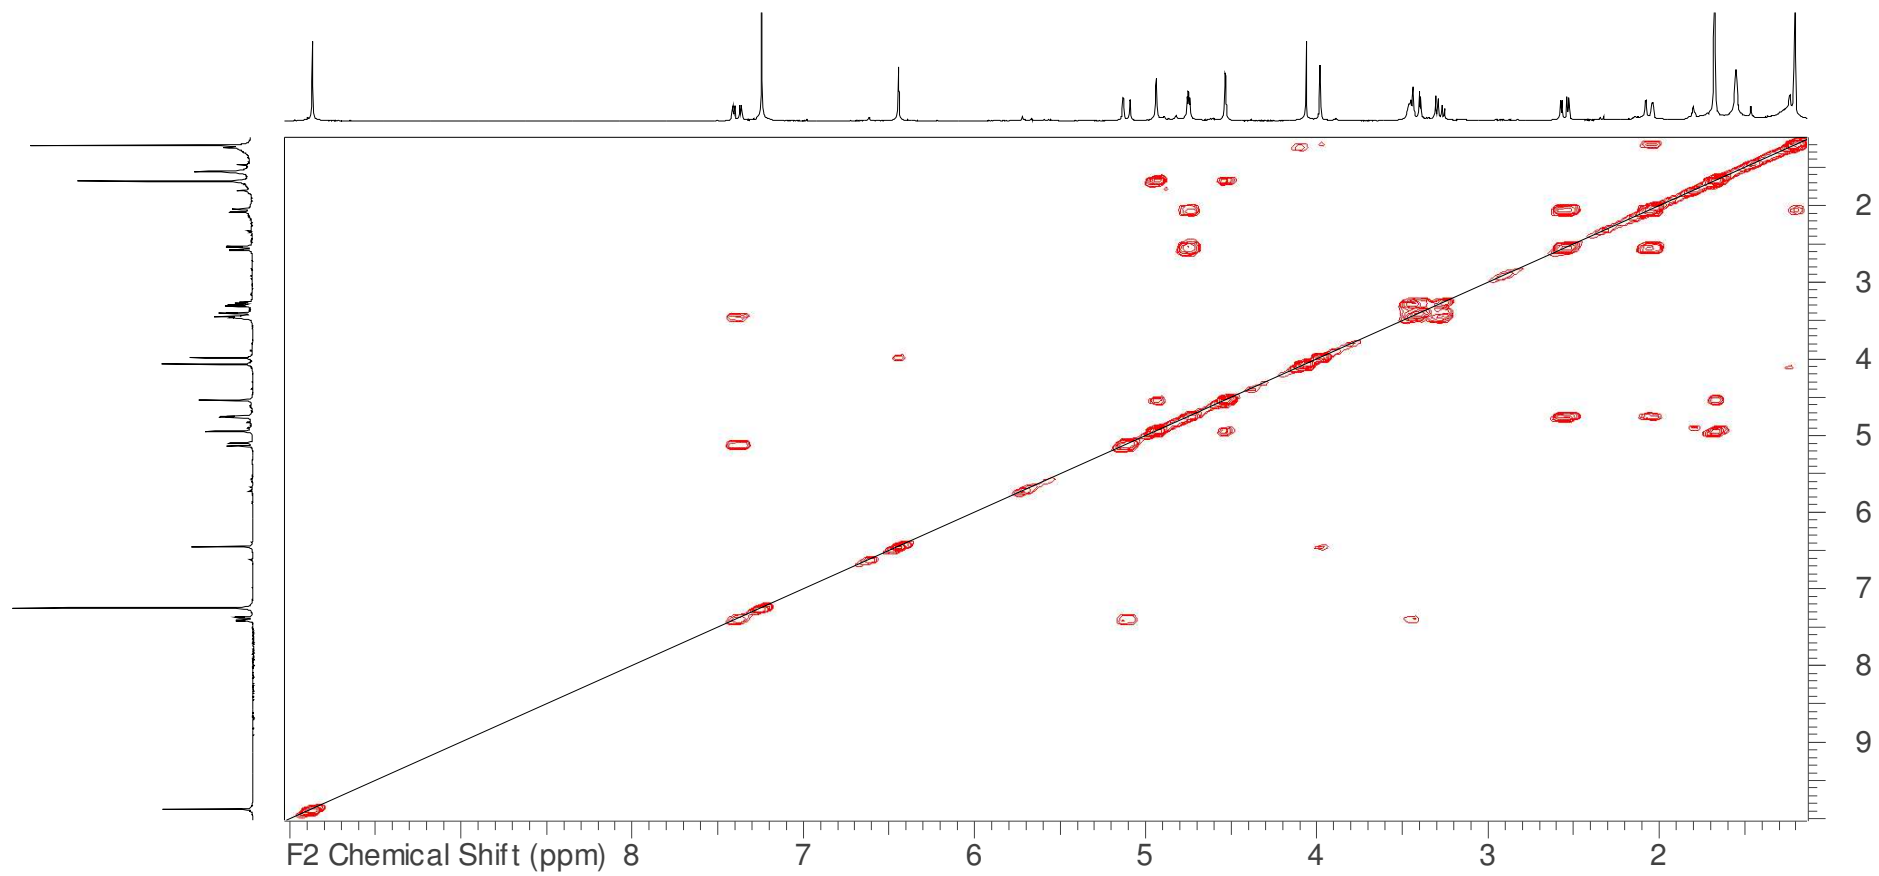

Figure S5. gCOSY of keikipukalide A (**1**) in CDCl<sub>3</sub>, 400 MHz

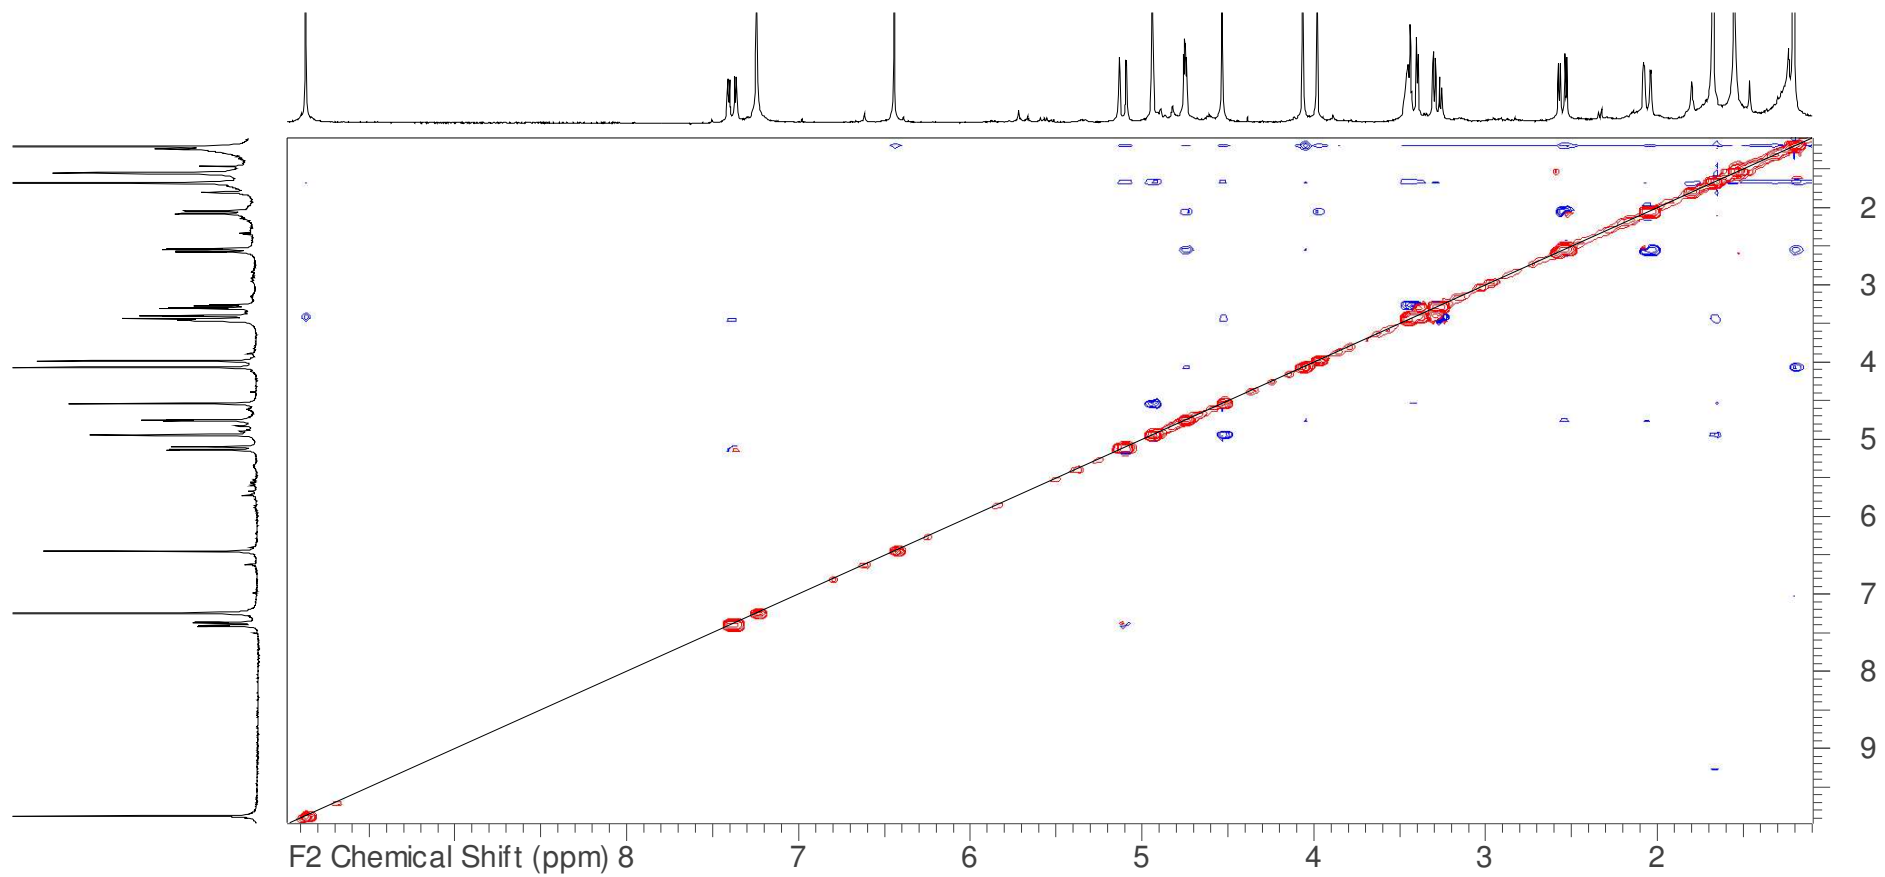

Figure S6. NOESY of keikipukalide A (**1**) in CDCl<sub>3</sub>, 500 MHz



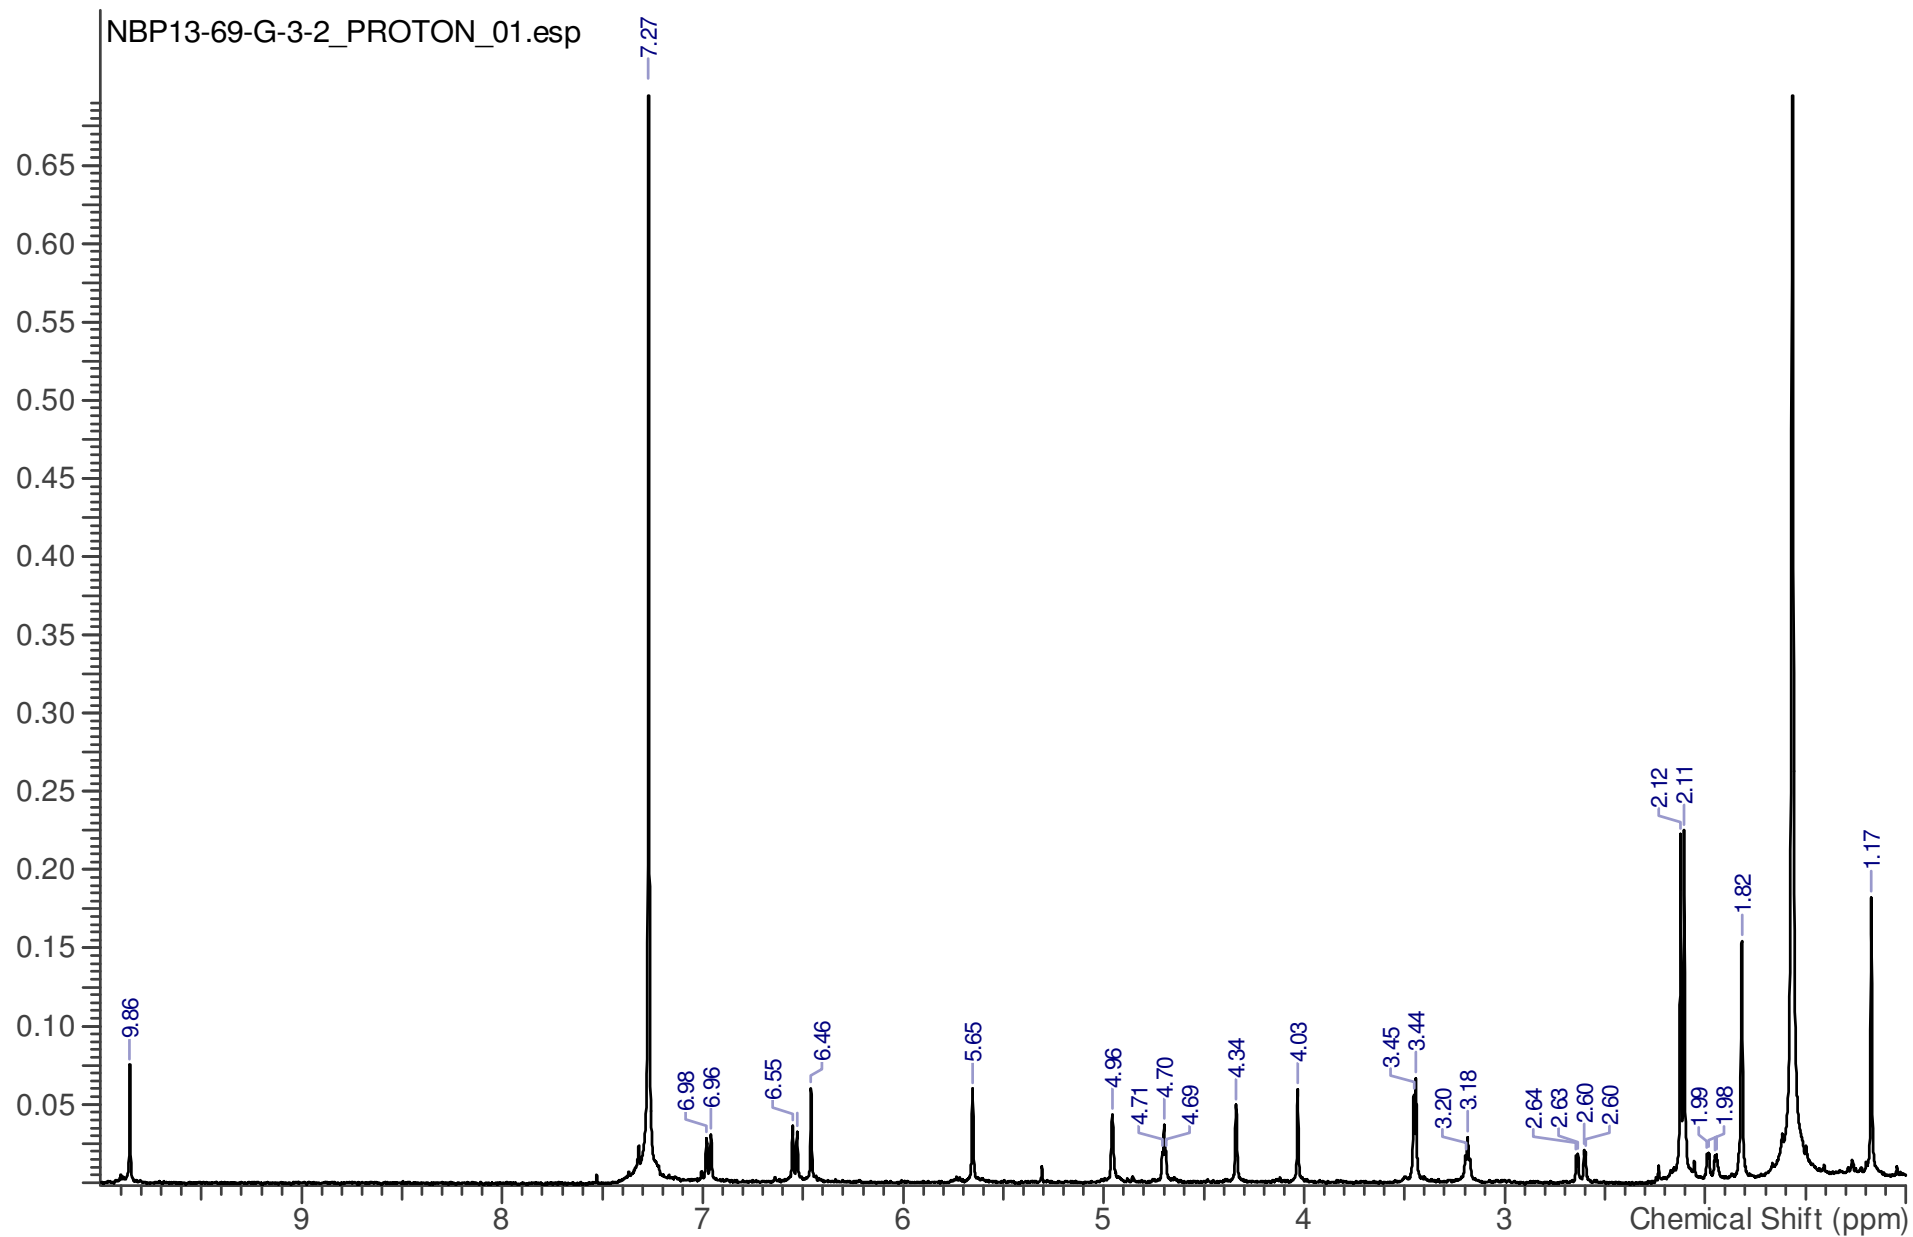

Figure S7.  $^1\text{H}$  NMR spectrum of keikipukalide B (**2**) in  $\text{CDCl}_3$ , 400 MHz

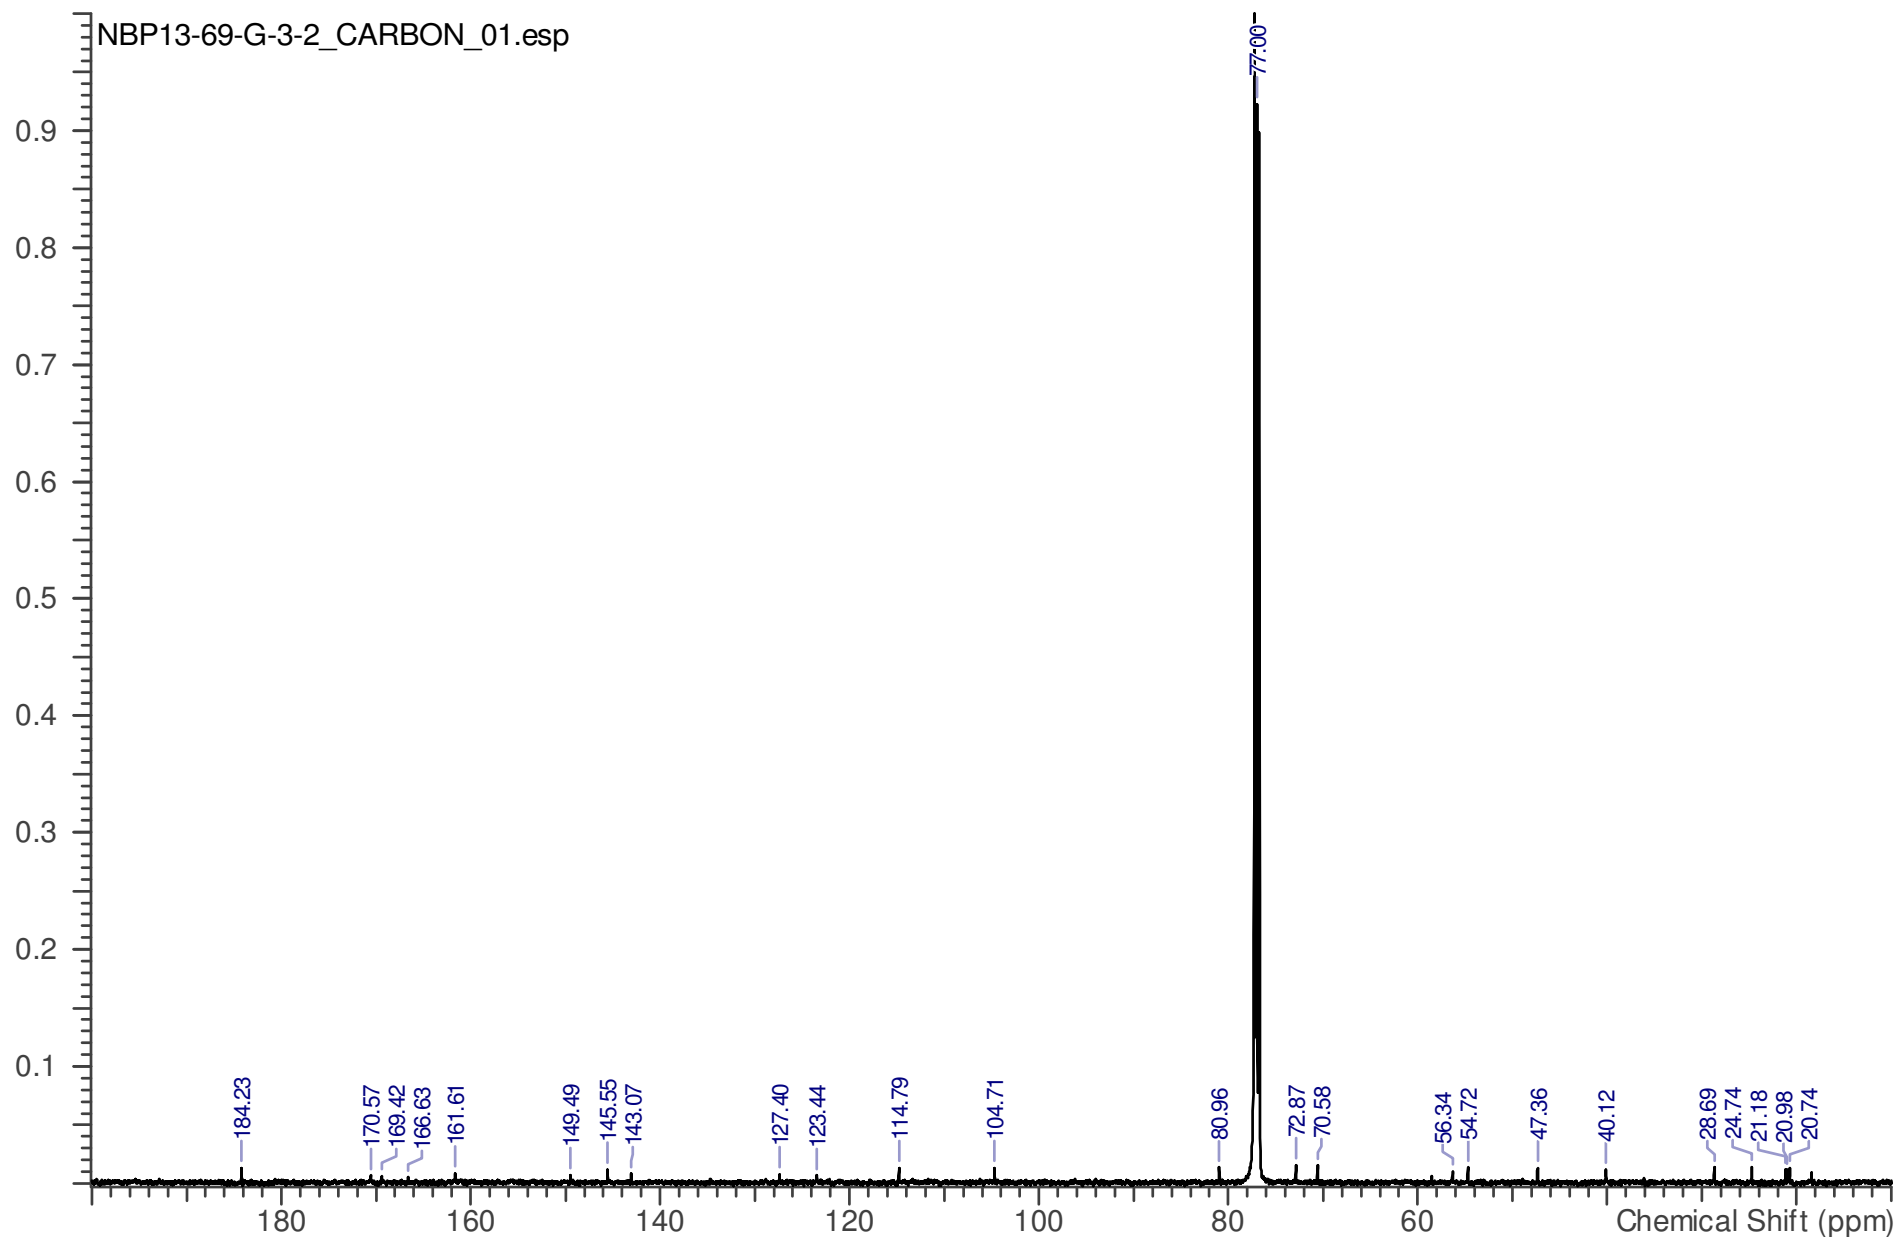

Figure S8.  $^{13}\text{C}$  NMR spectrum of keikipukalide B (**2**) in  $\text{CDCl}_3$ , 125 MHz

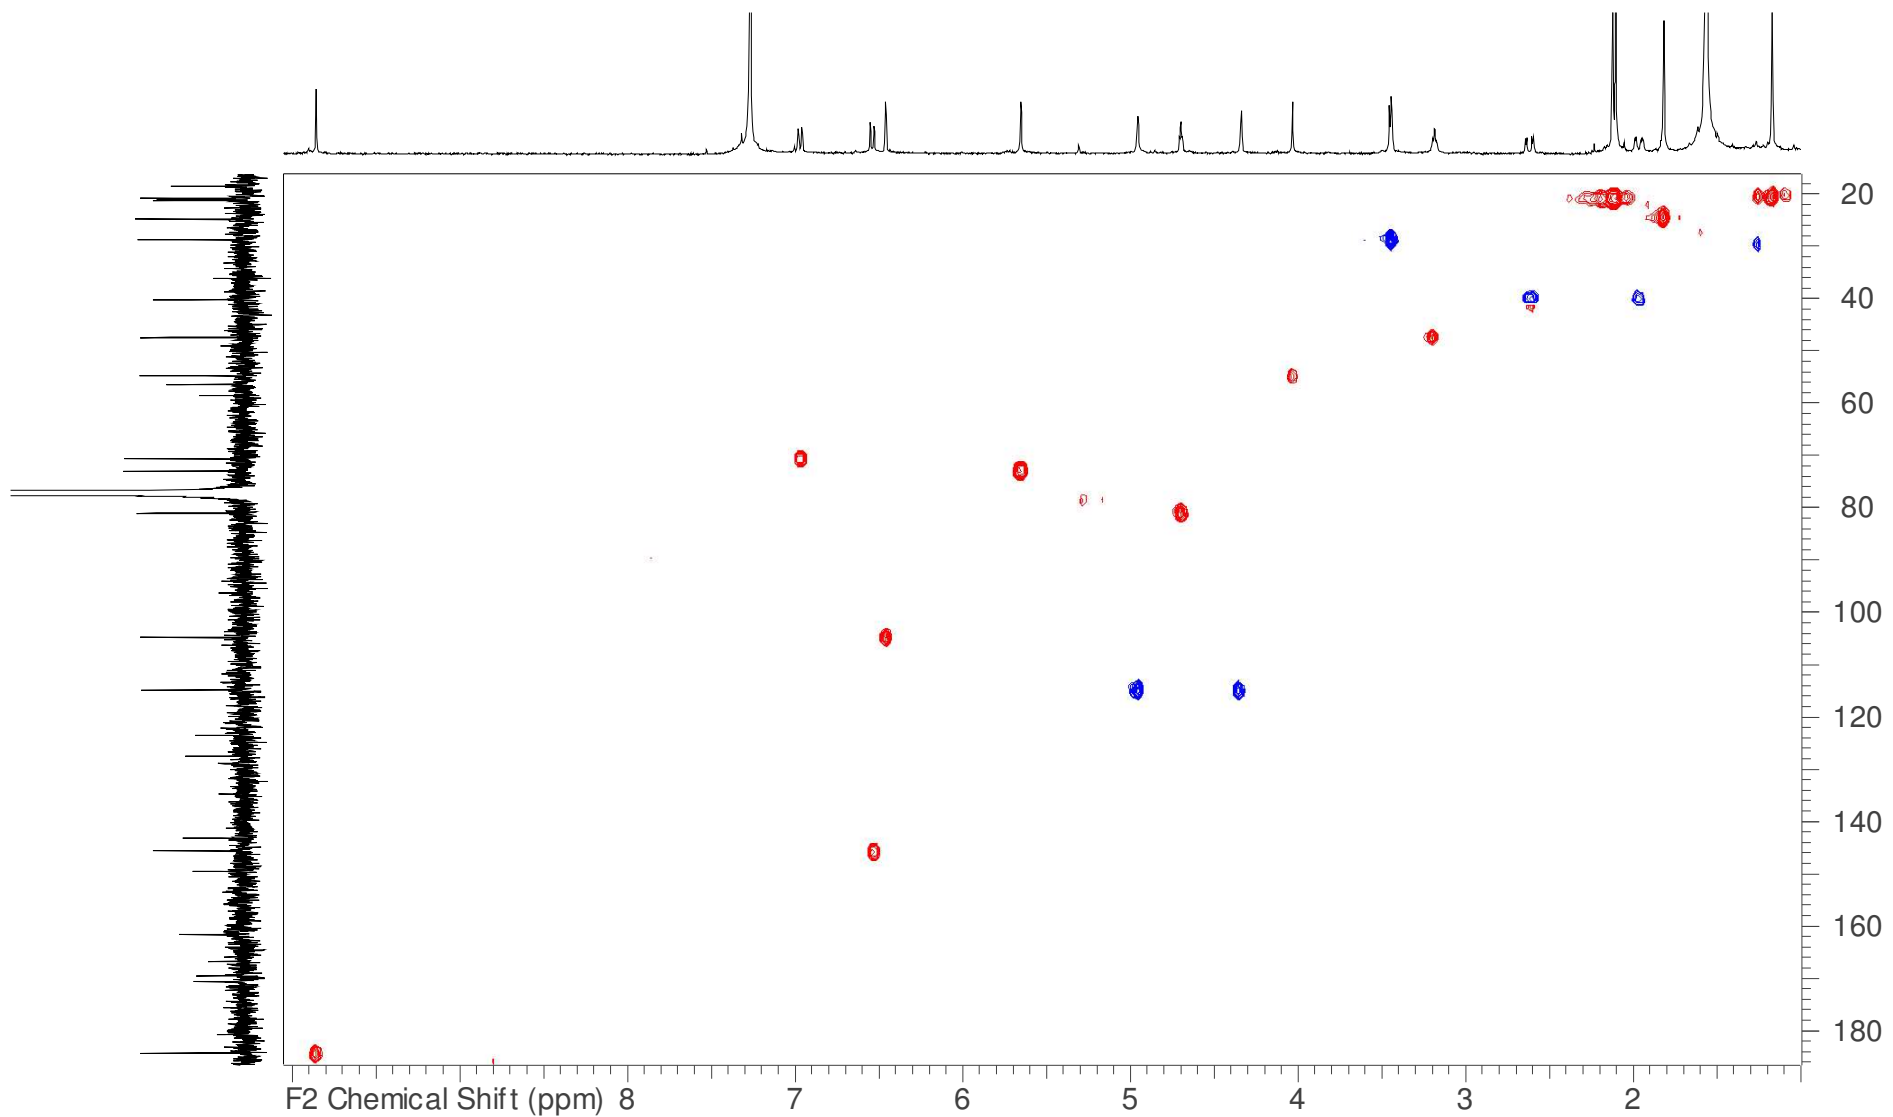

Figure S9. gHSQC of keikipukalide B (2) in CDCl<sub>3</sub>, 600 MHz

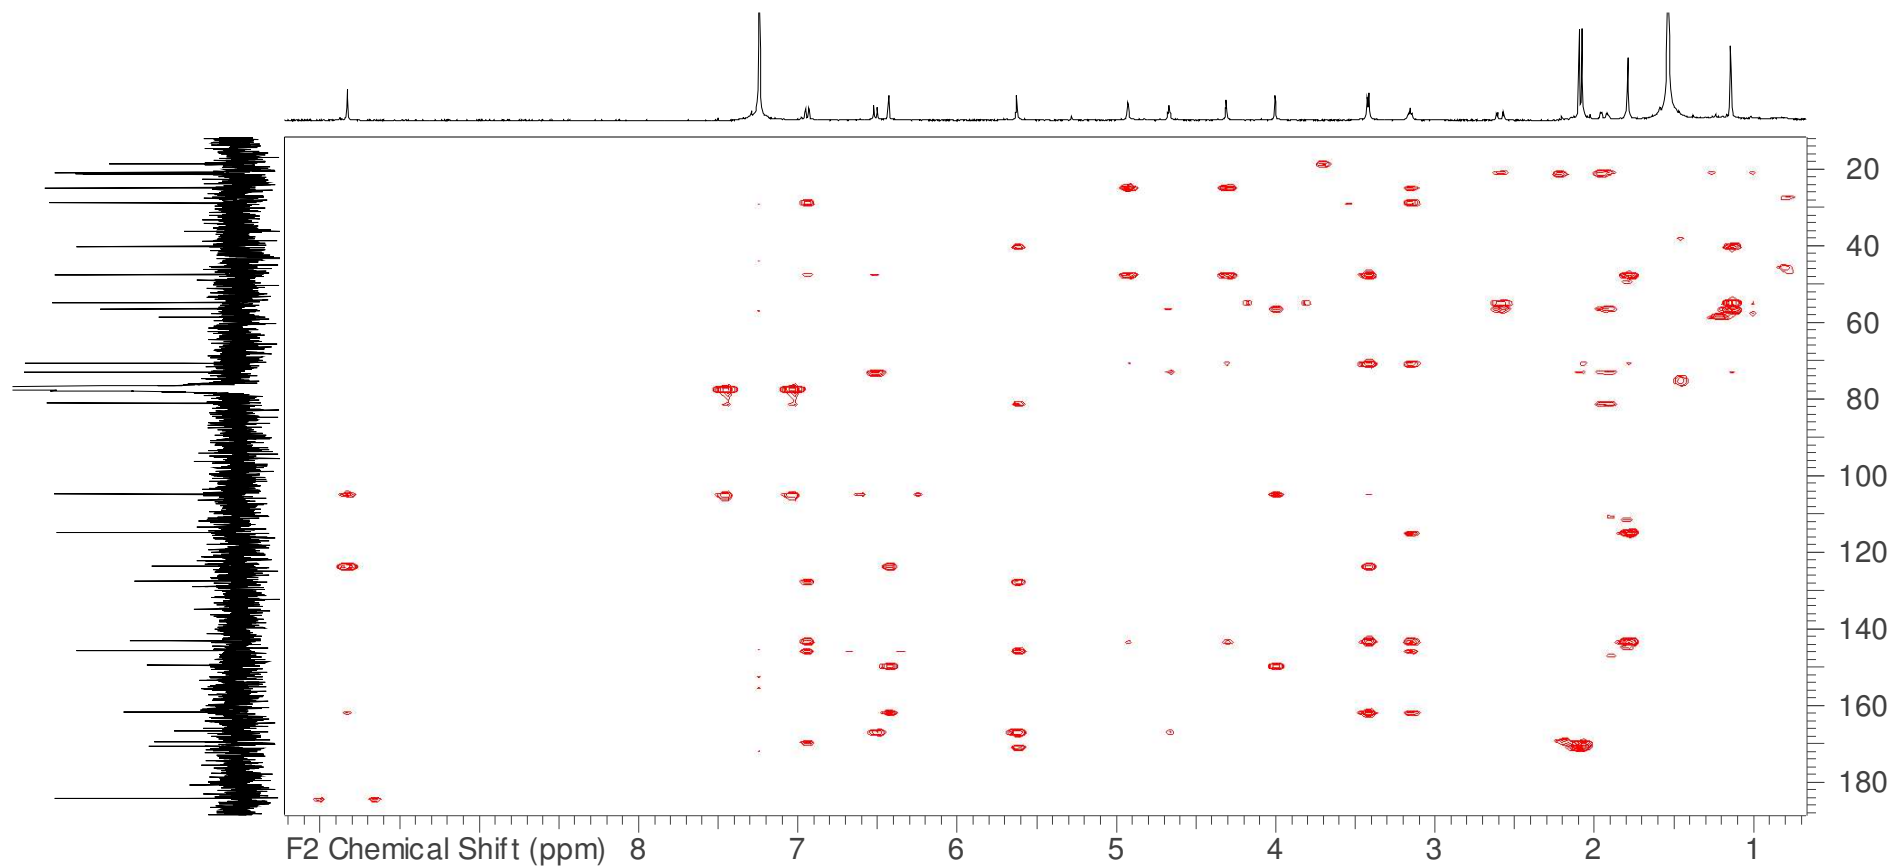

Figure S10. gHMBC of keikipukalide B (**2**) in CDCl<sub>3</sub>, 500 MHz

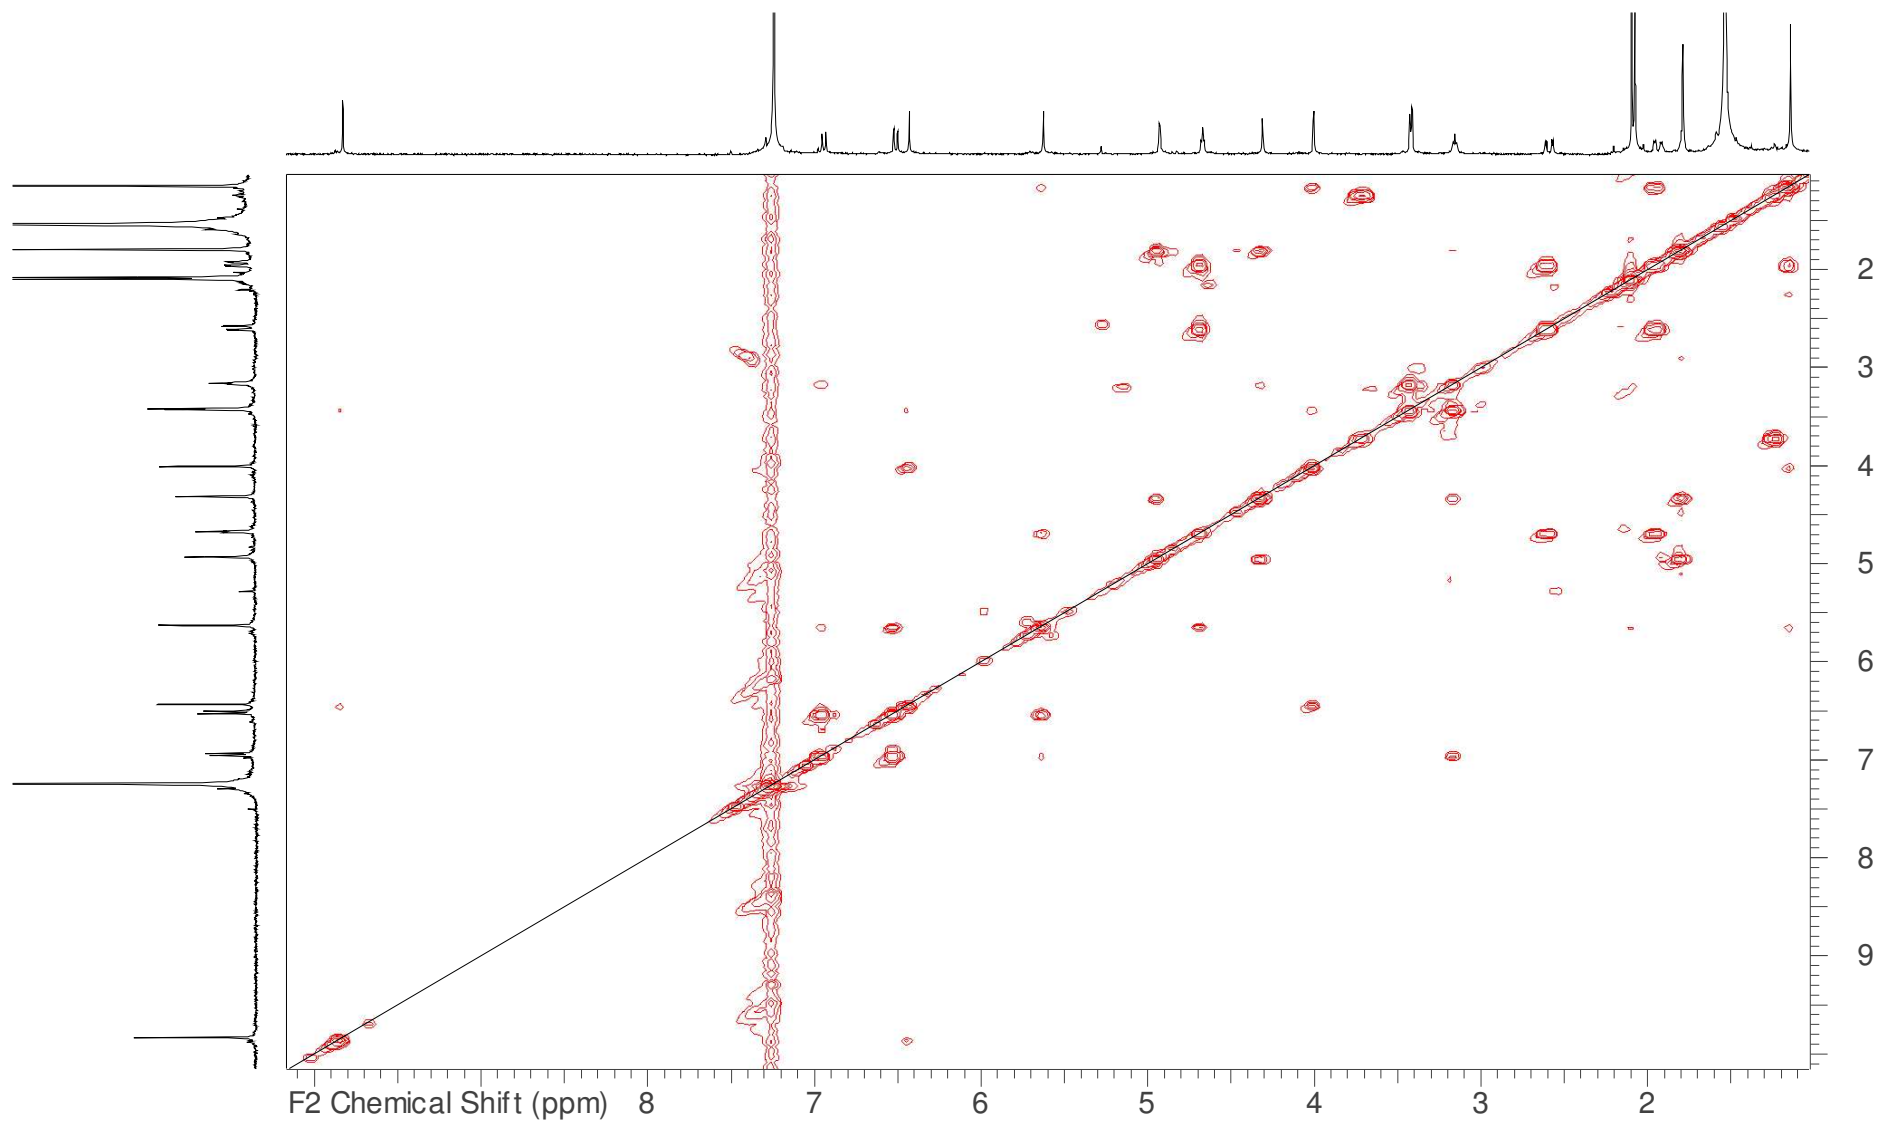

Figure S11. gCOSY of keikipukalide B (**2**) in CDCl<sub>3</sub>, 500 MHz

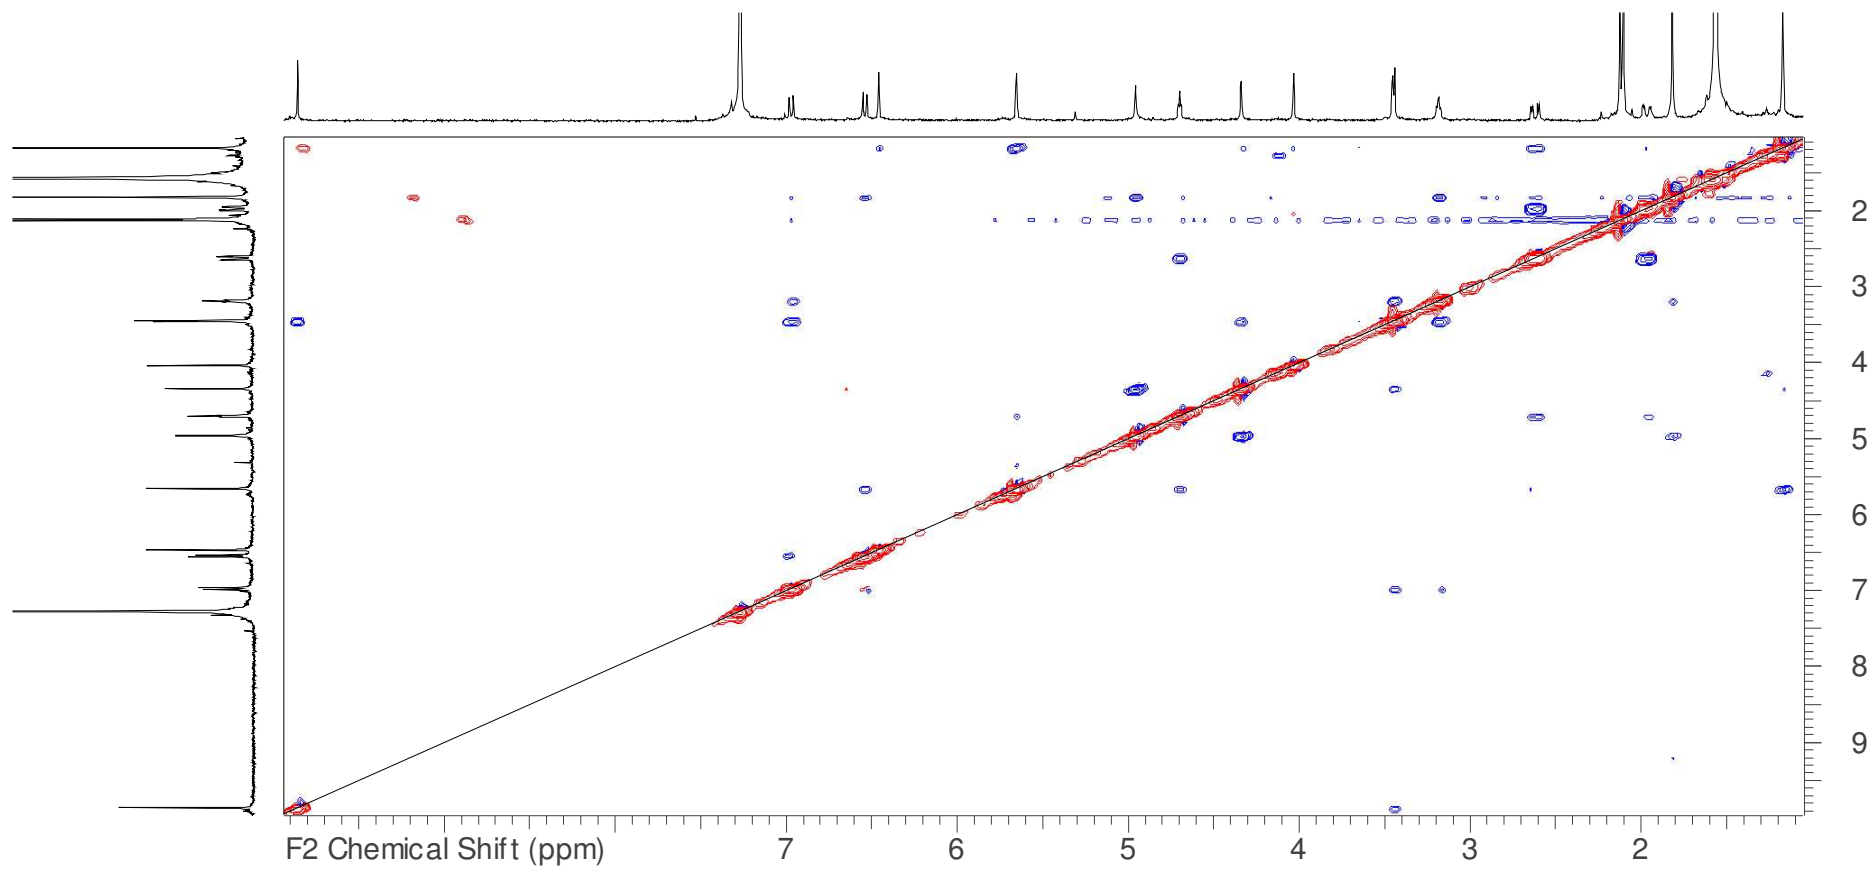

Figure S12. NOESY of keikipukalide B (**2**) in CDCl<sub>3</sub>, 400 MHz

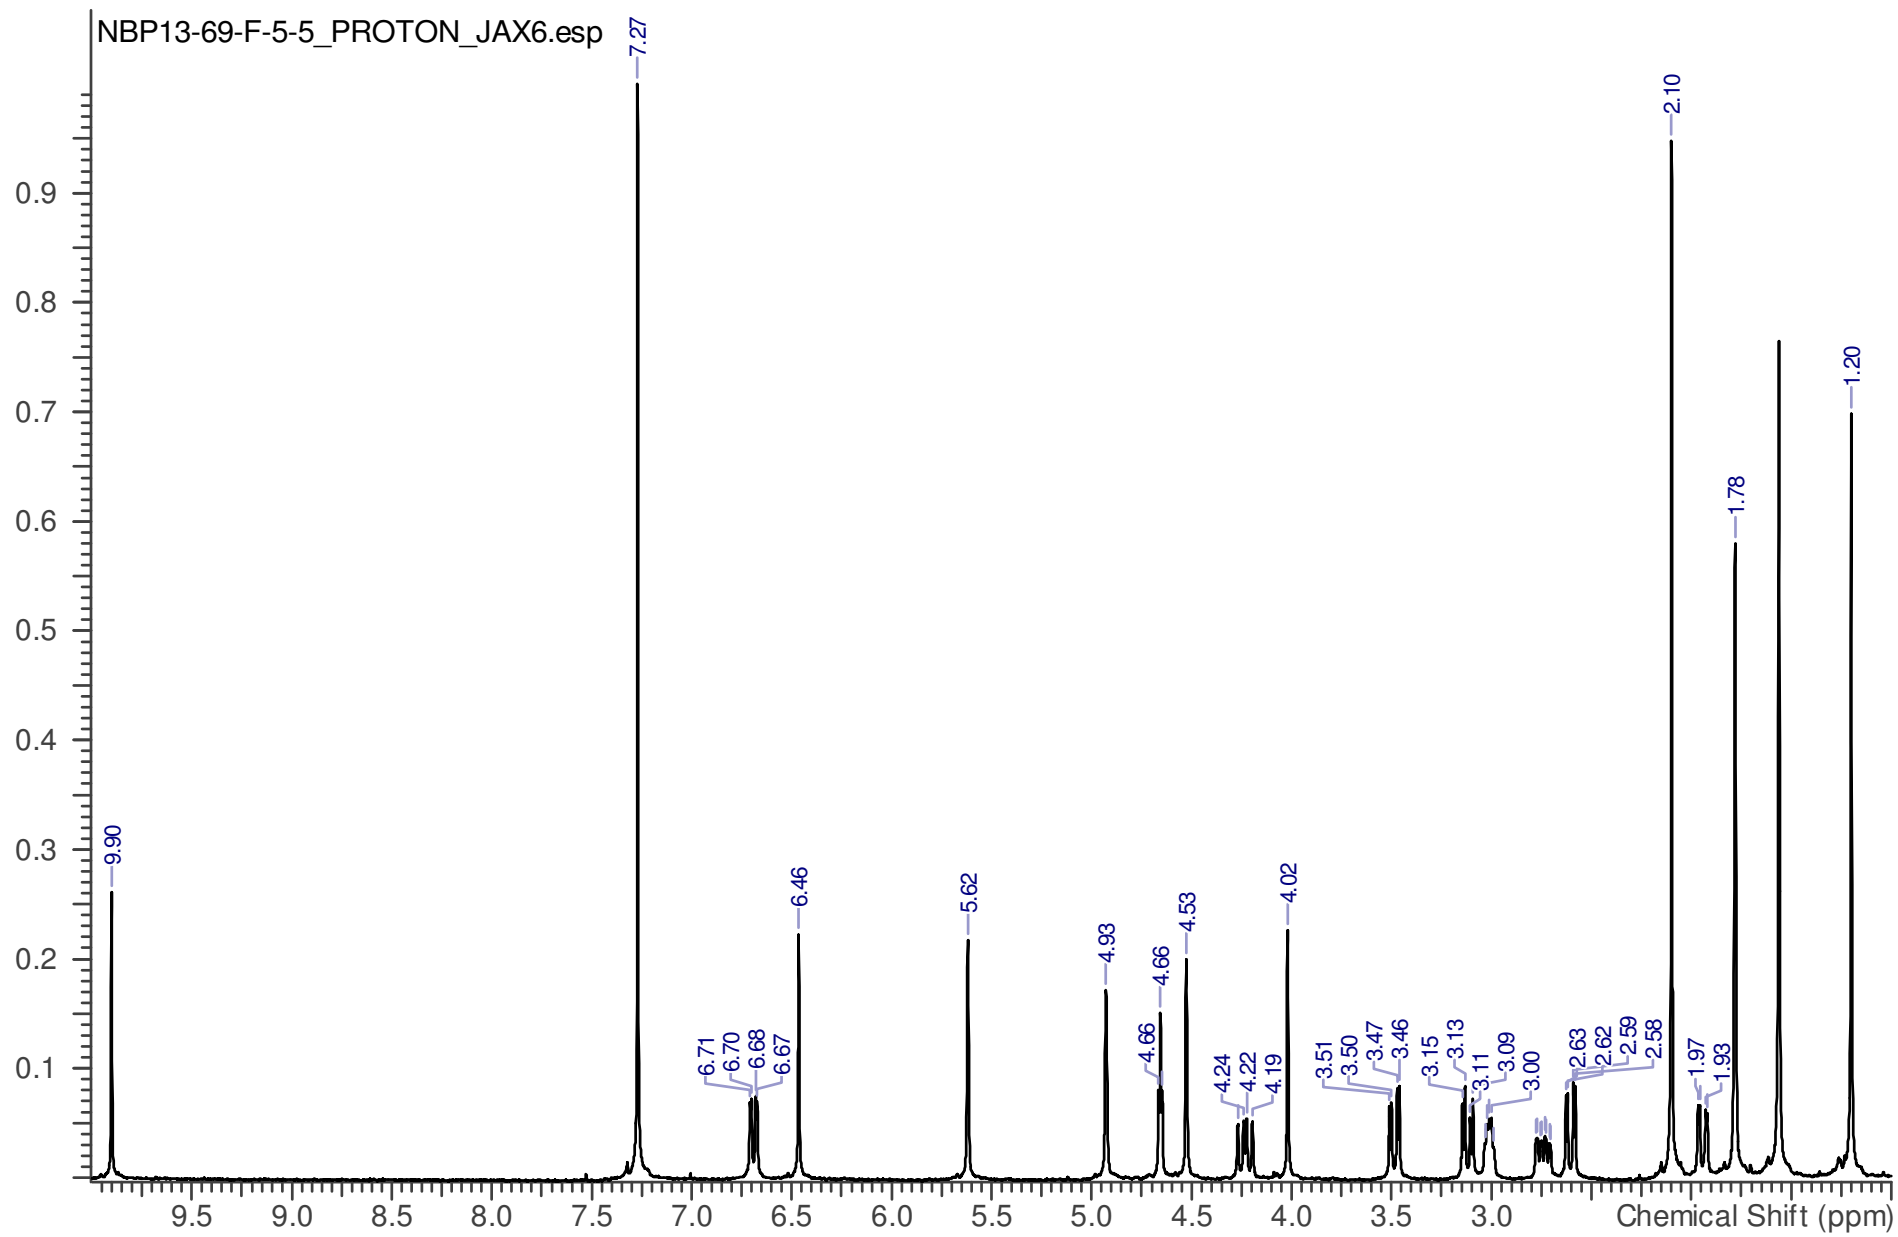

Figure S13.  $^1\text{H}$  NMR spectrum of keikipukalide C (**3**) in  $\text{CDCl}_3$ , 400 MHz

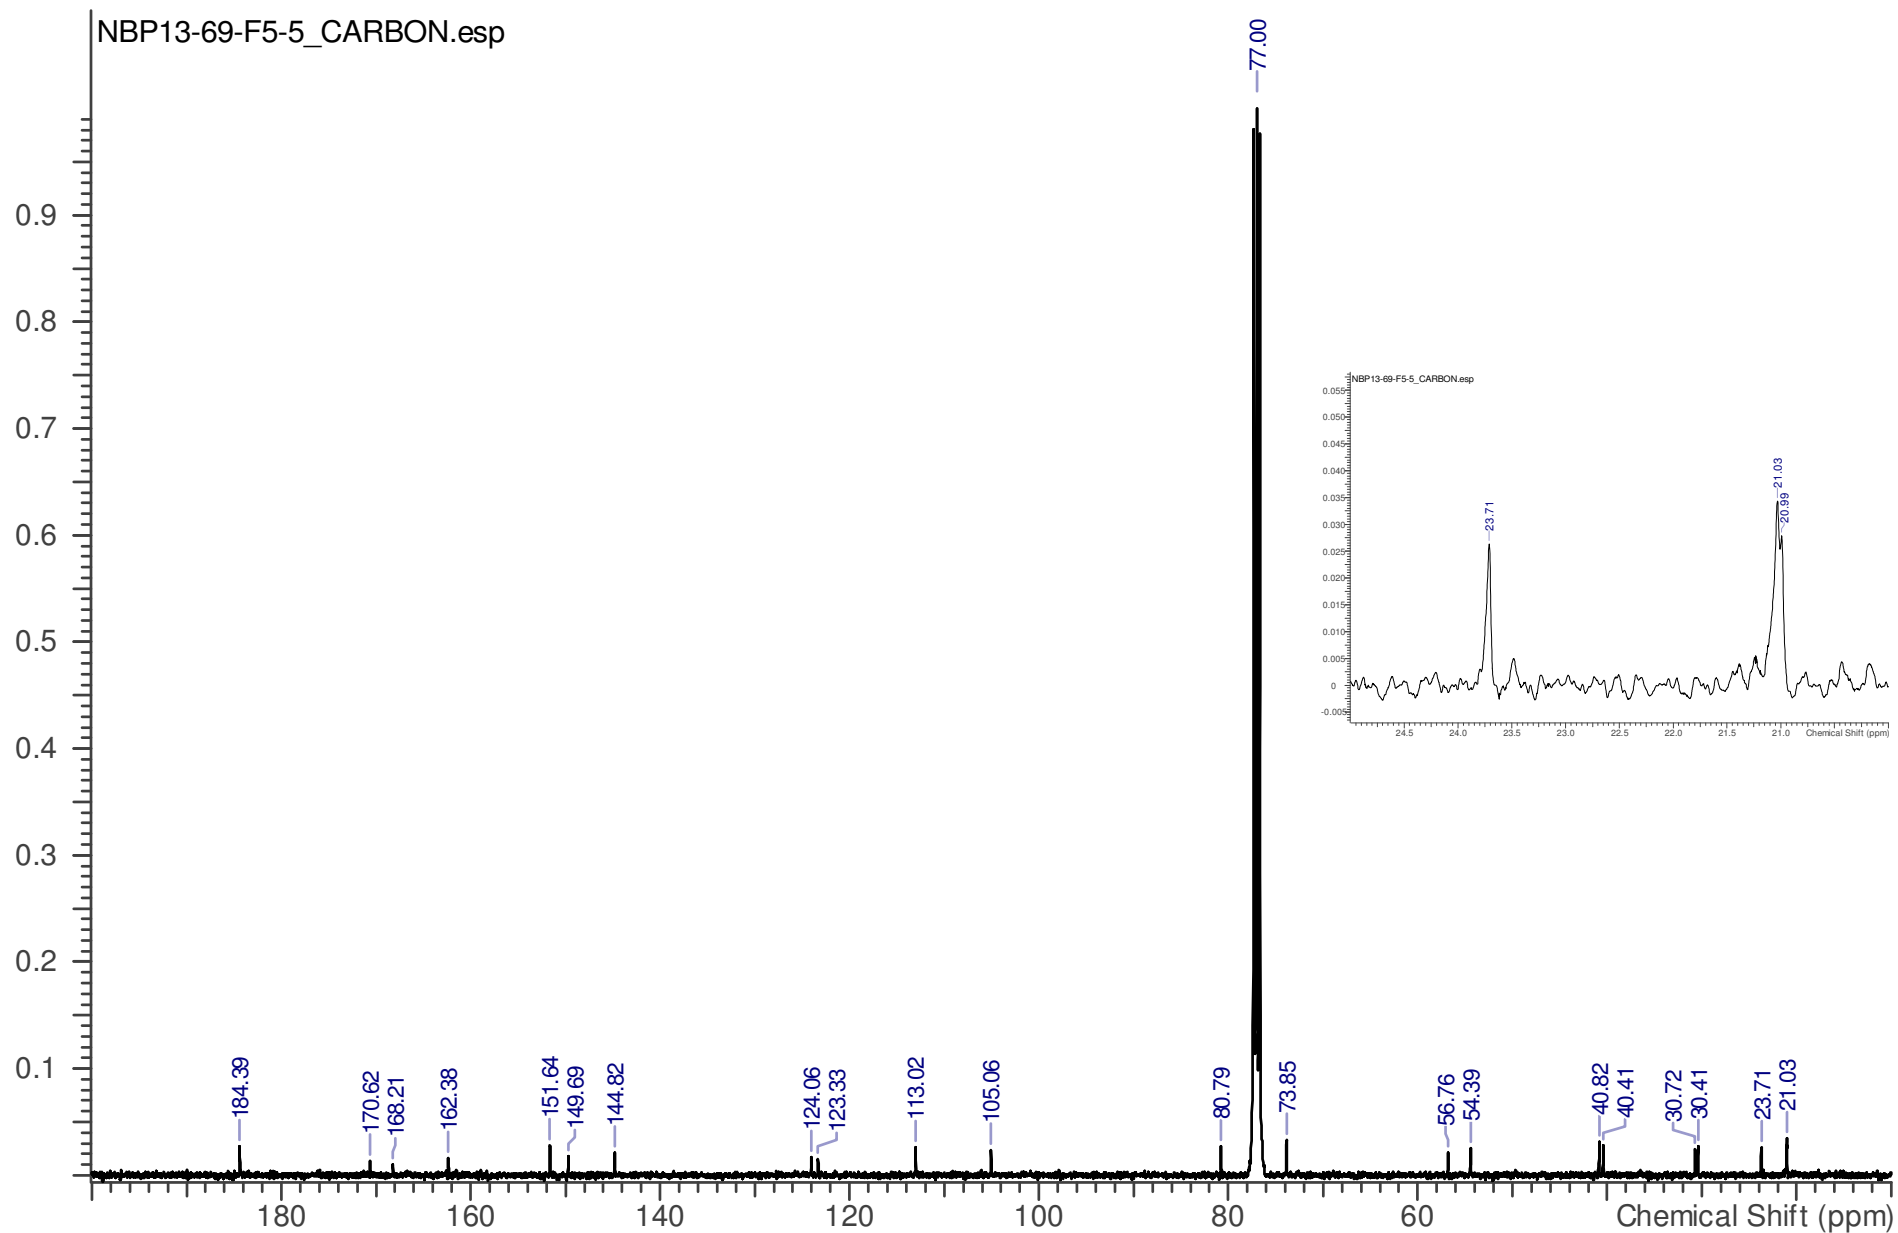

Figure S14.  $^{13}\text{C}$  NMR spectrum of keikipukalide C (**3**) in  $\text{CDCl}_3$ , 100 MHz Inset: expansion of 20-25 ppm illustrating all resonances in the region, one of which does not display in the full spectrum due to congestion.



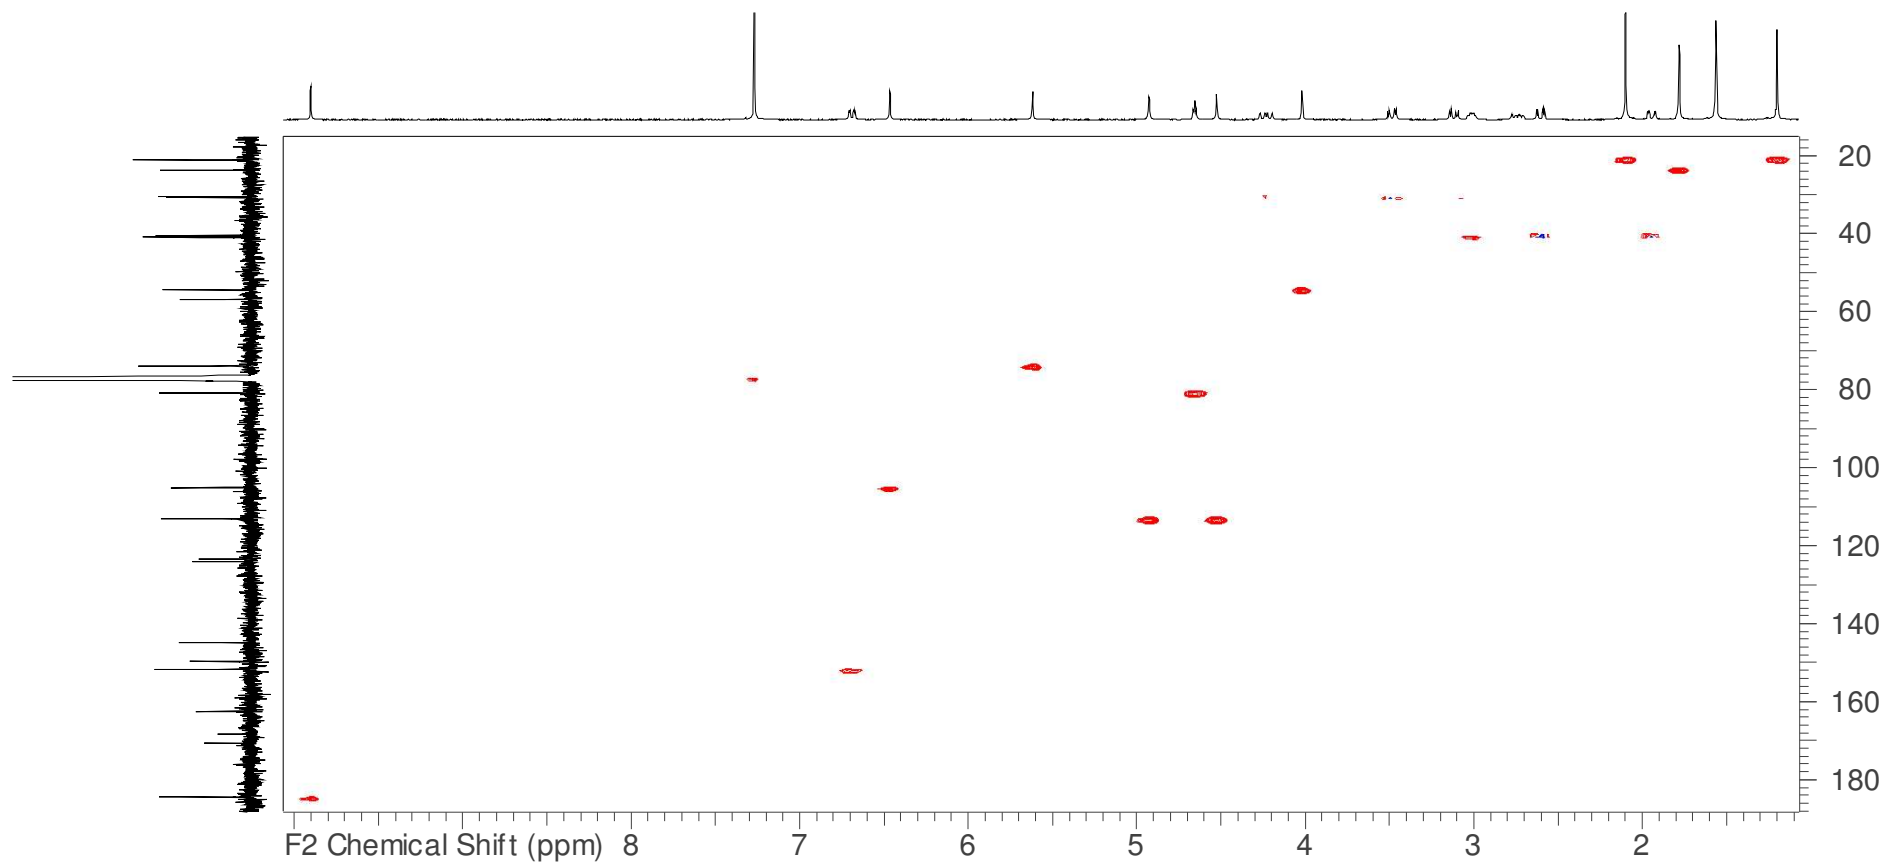

Figure S15. gHMQC of keikipukalide C (**3**) in CDCl<sub>3</sub>, 400 MHz

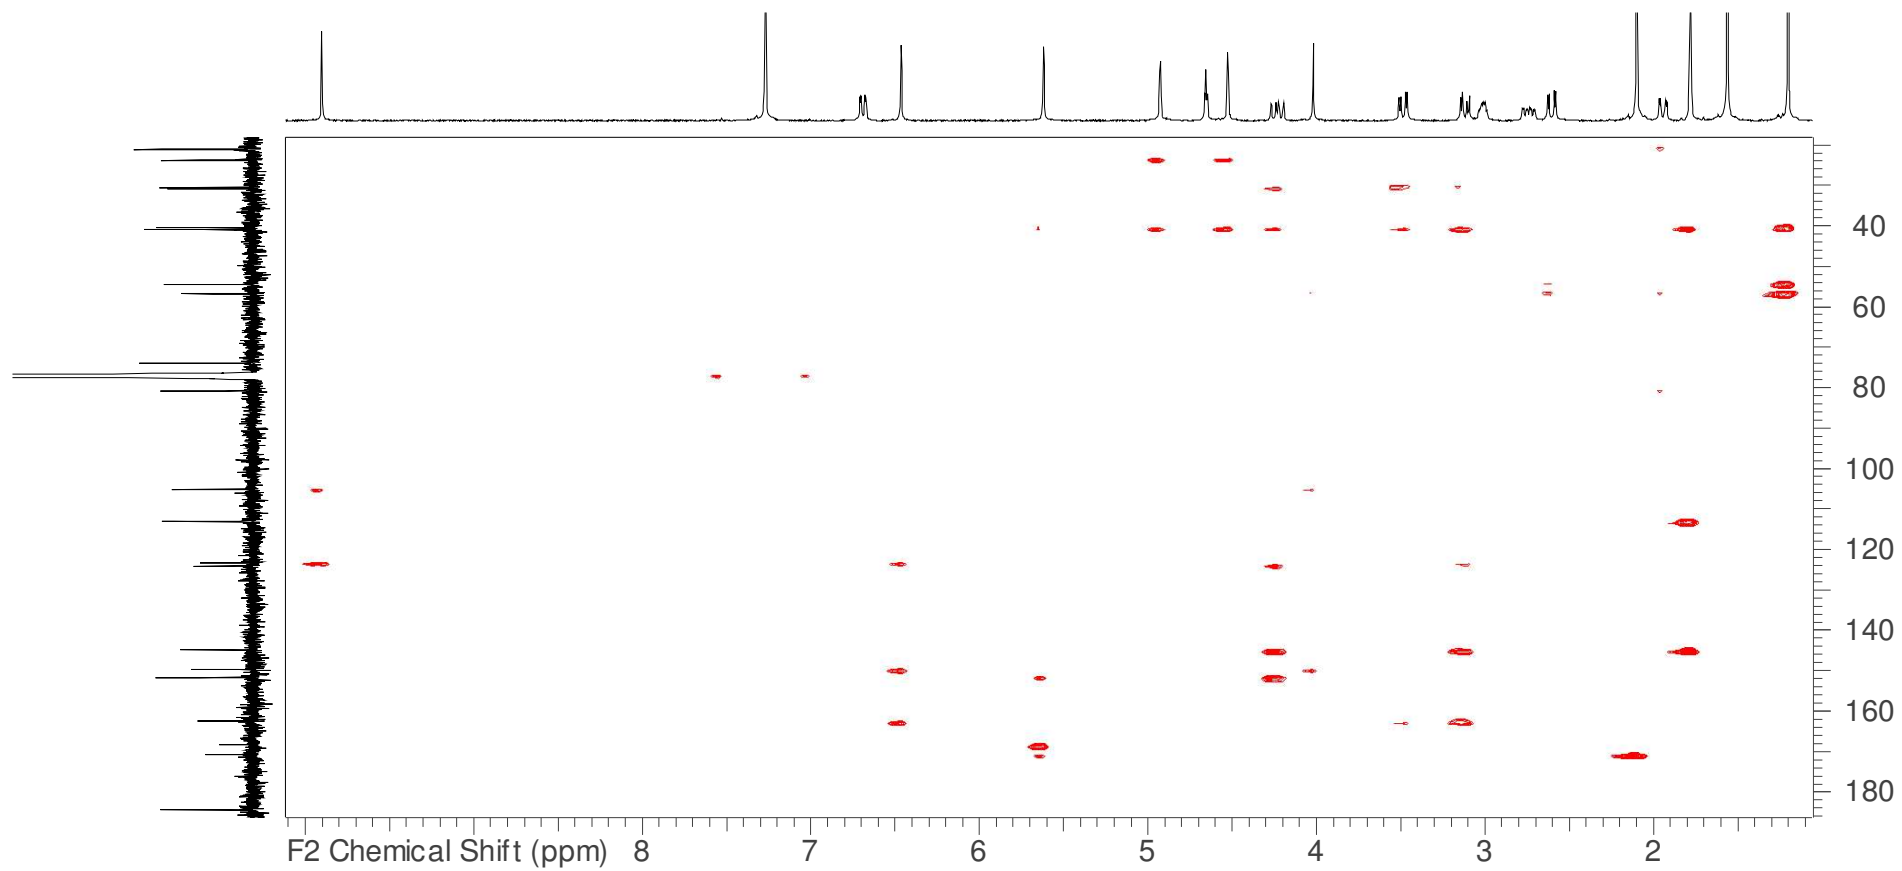

Figure S16. gHMBC of keikipukalide C (**3**) in CDCl<sub>3</sub>, 400 MHz

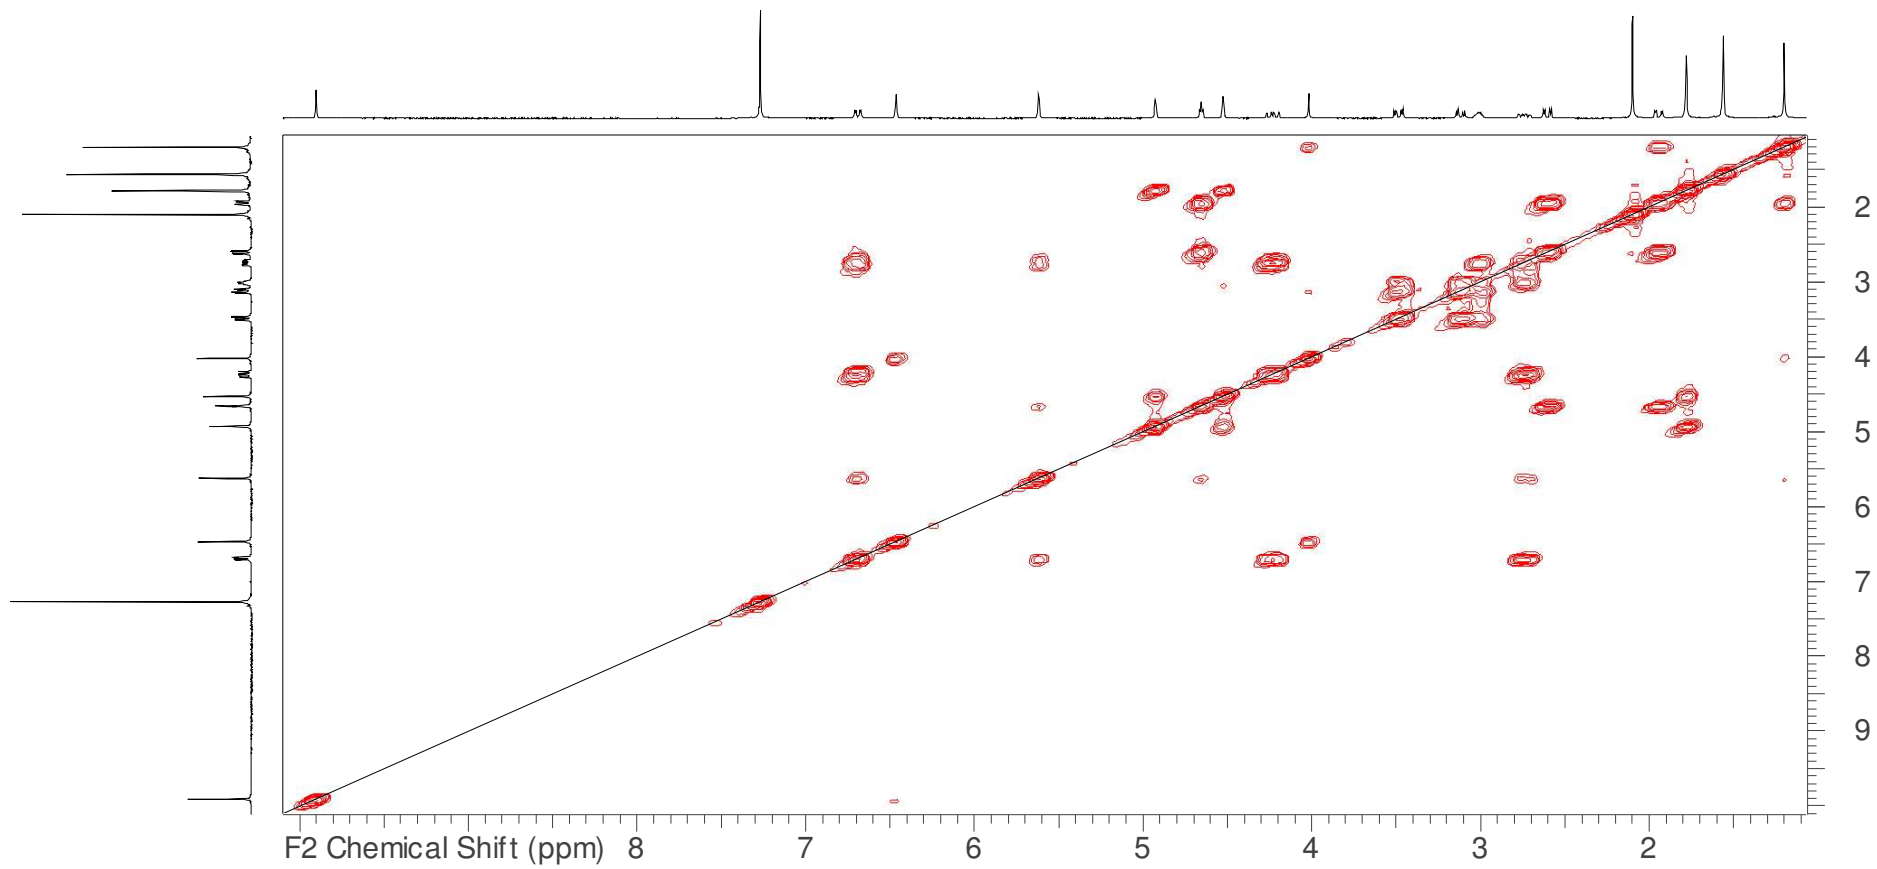

Figure S17. gCOSY of keikipukalide C (**3**) in CDCl<sub>3</sub>, 400 MHz

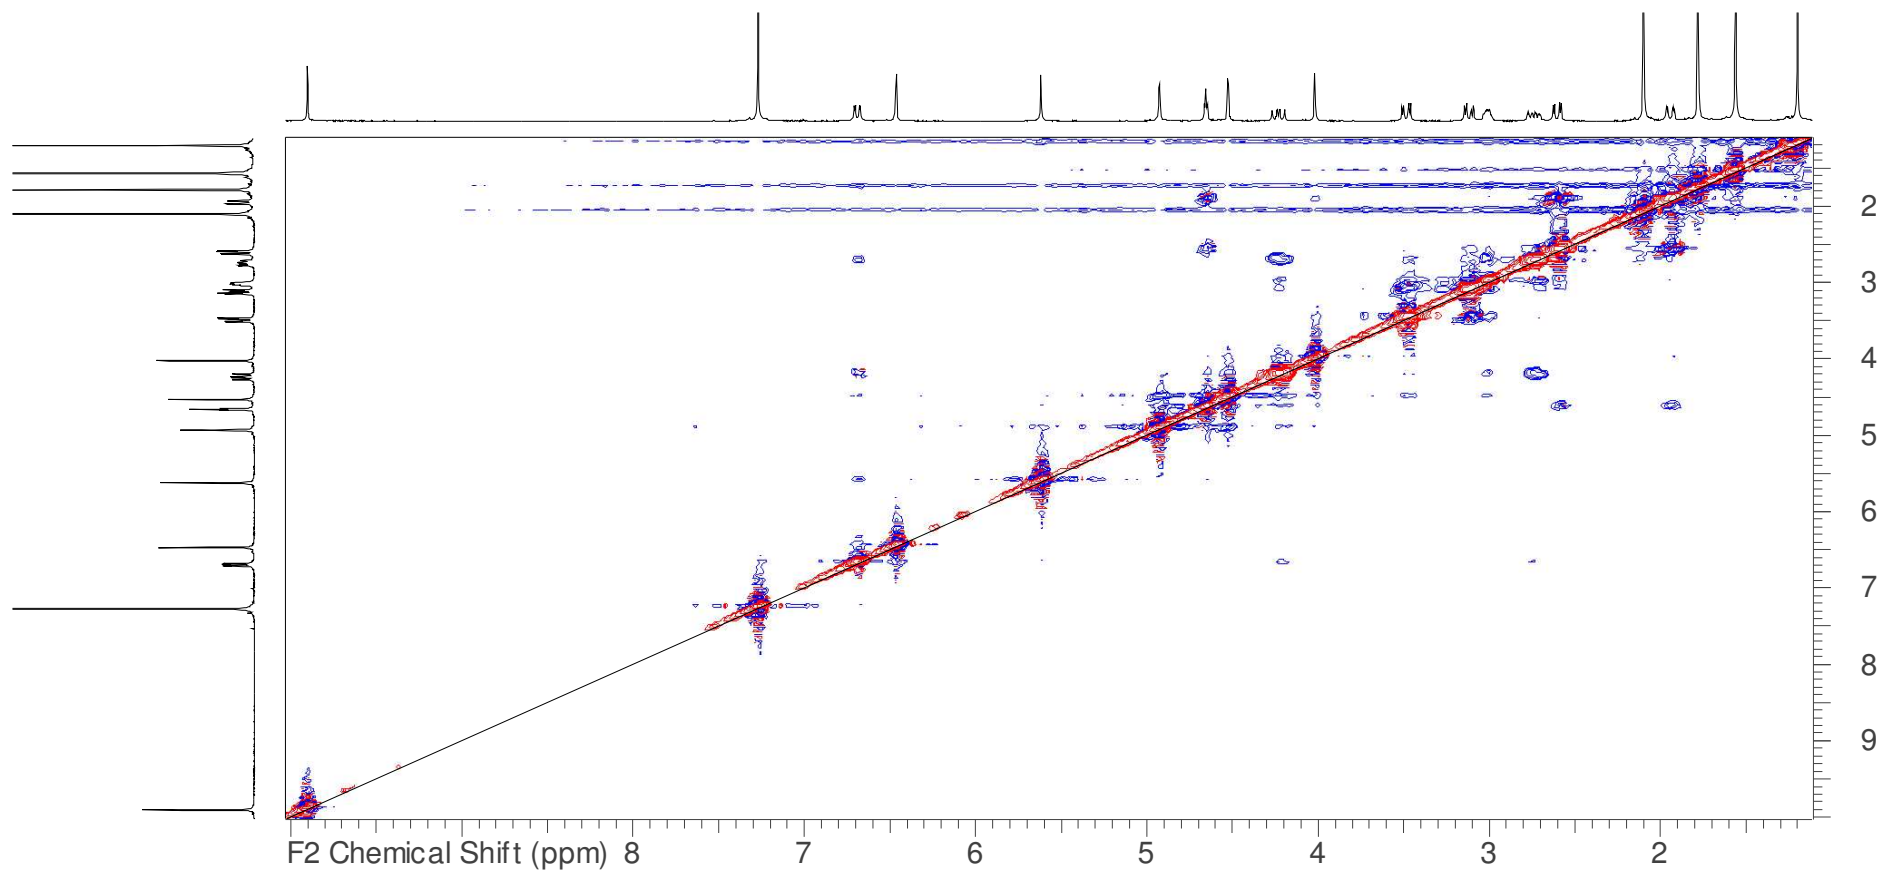

Figure S18. NOESY of keikipukalide C (**3**) in CDCl<sub>3</sub>, 400 MHz

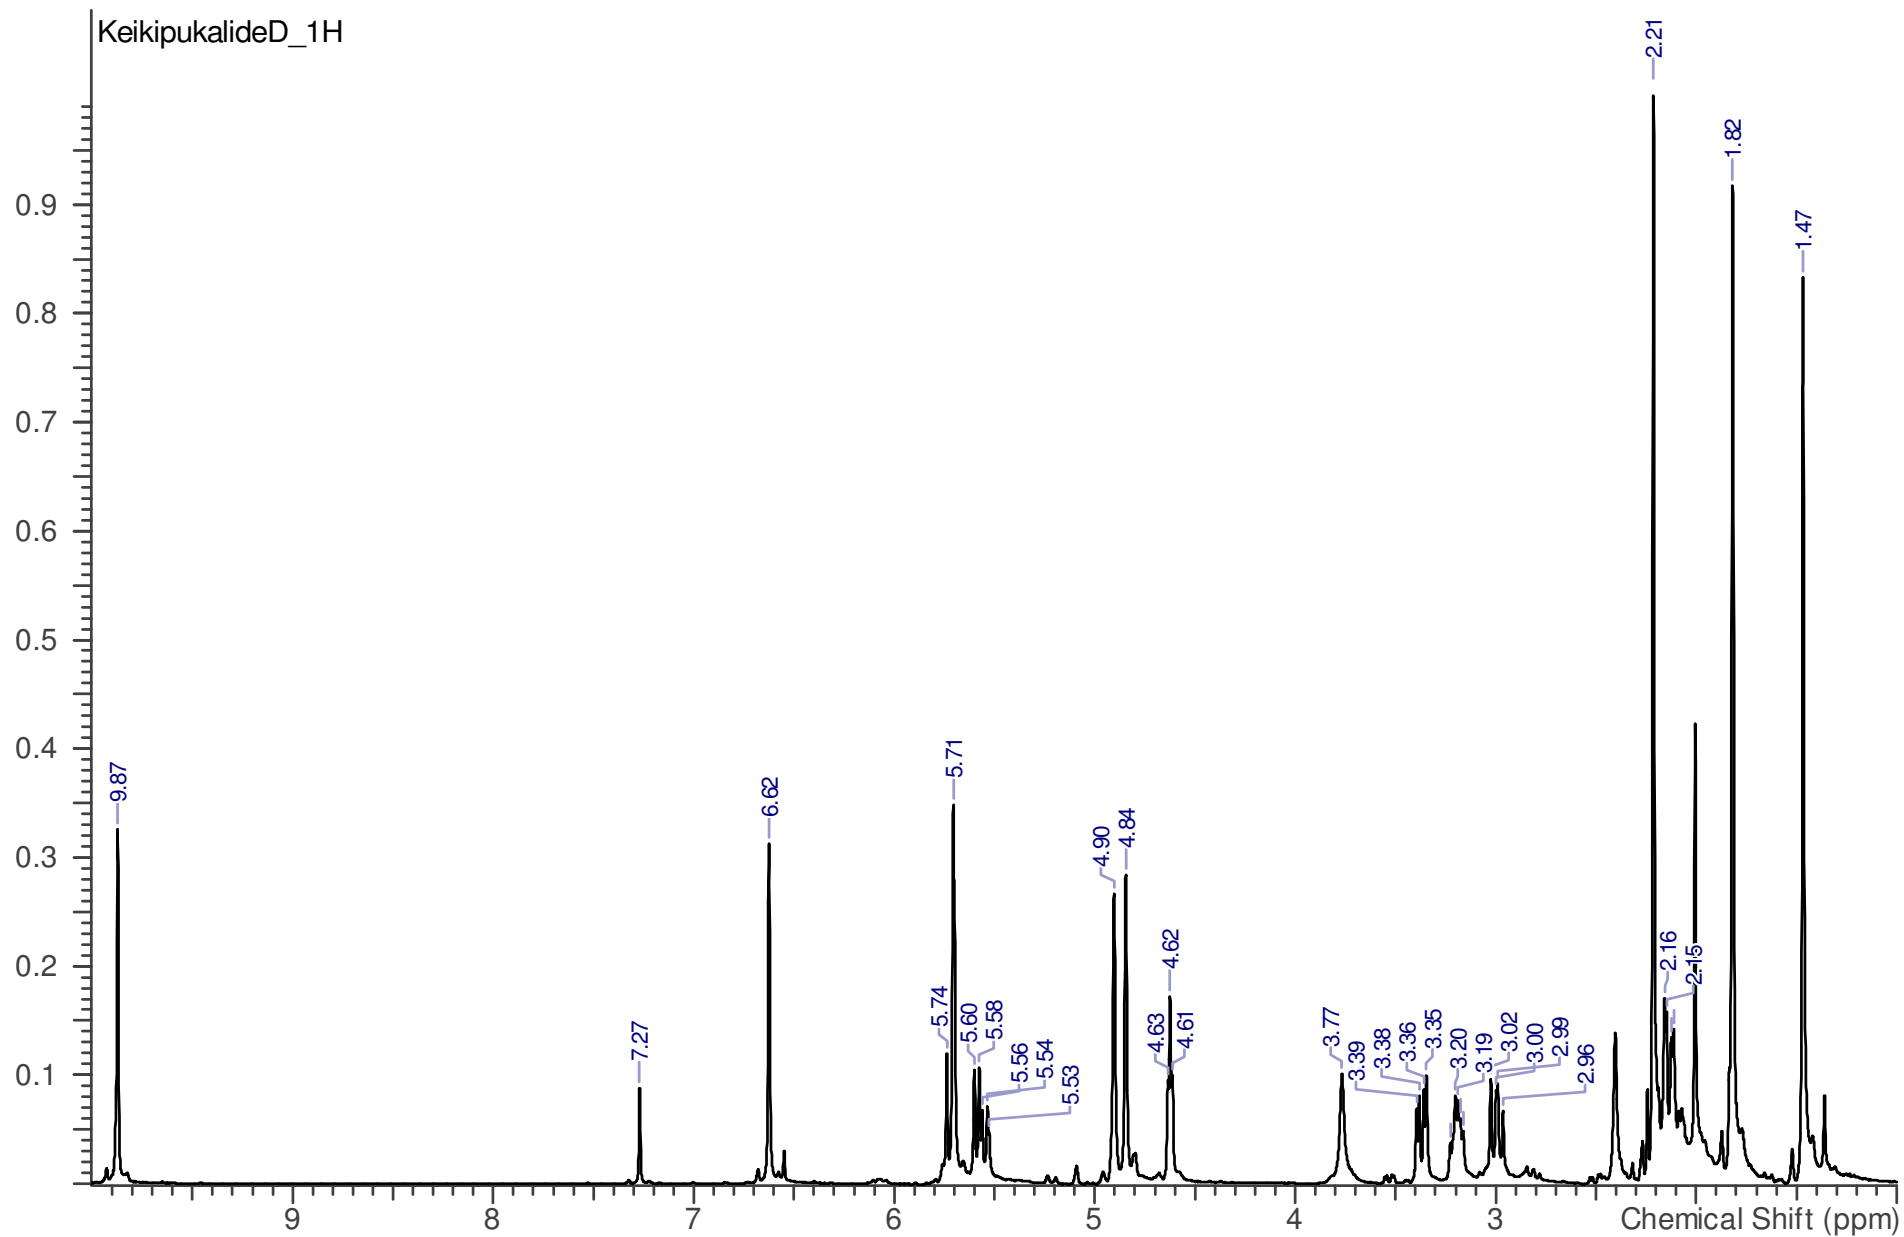

Figure S19.  $^1\text{H}$  NMR spectrum of keikipukalide D (**4**) in  $\text{CDCl}_3$ , 400 MHz

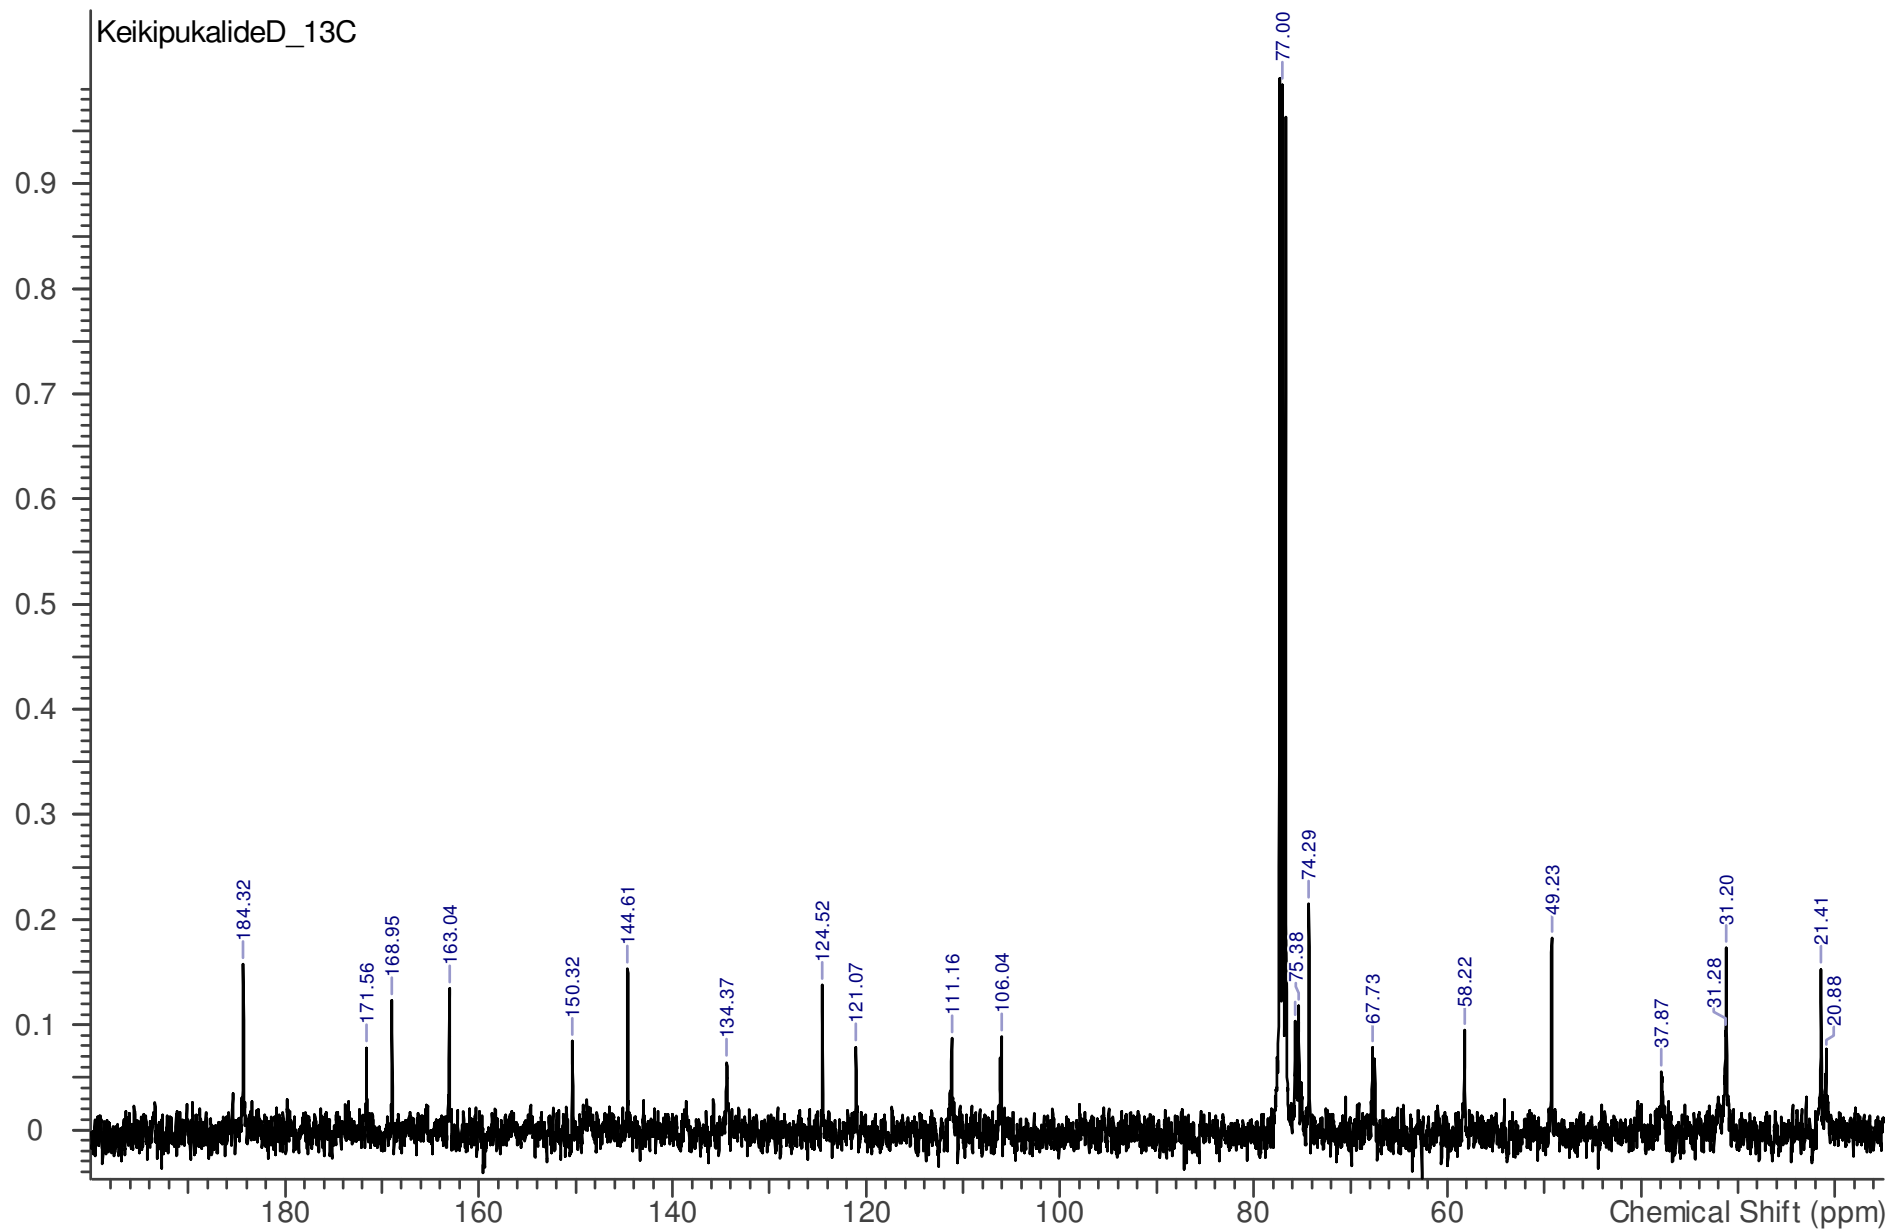

Figure S20.  $^{13}\text{C}$  NMR spectrum of keikipukalide D (**4**) in  $\text{CDCl}_3$ , 100 MHz

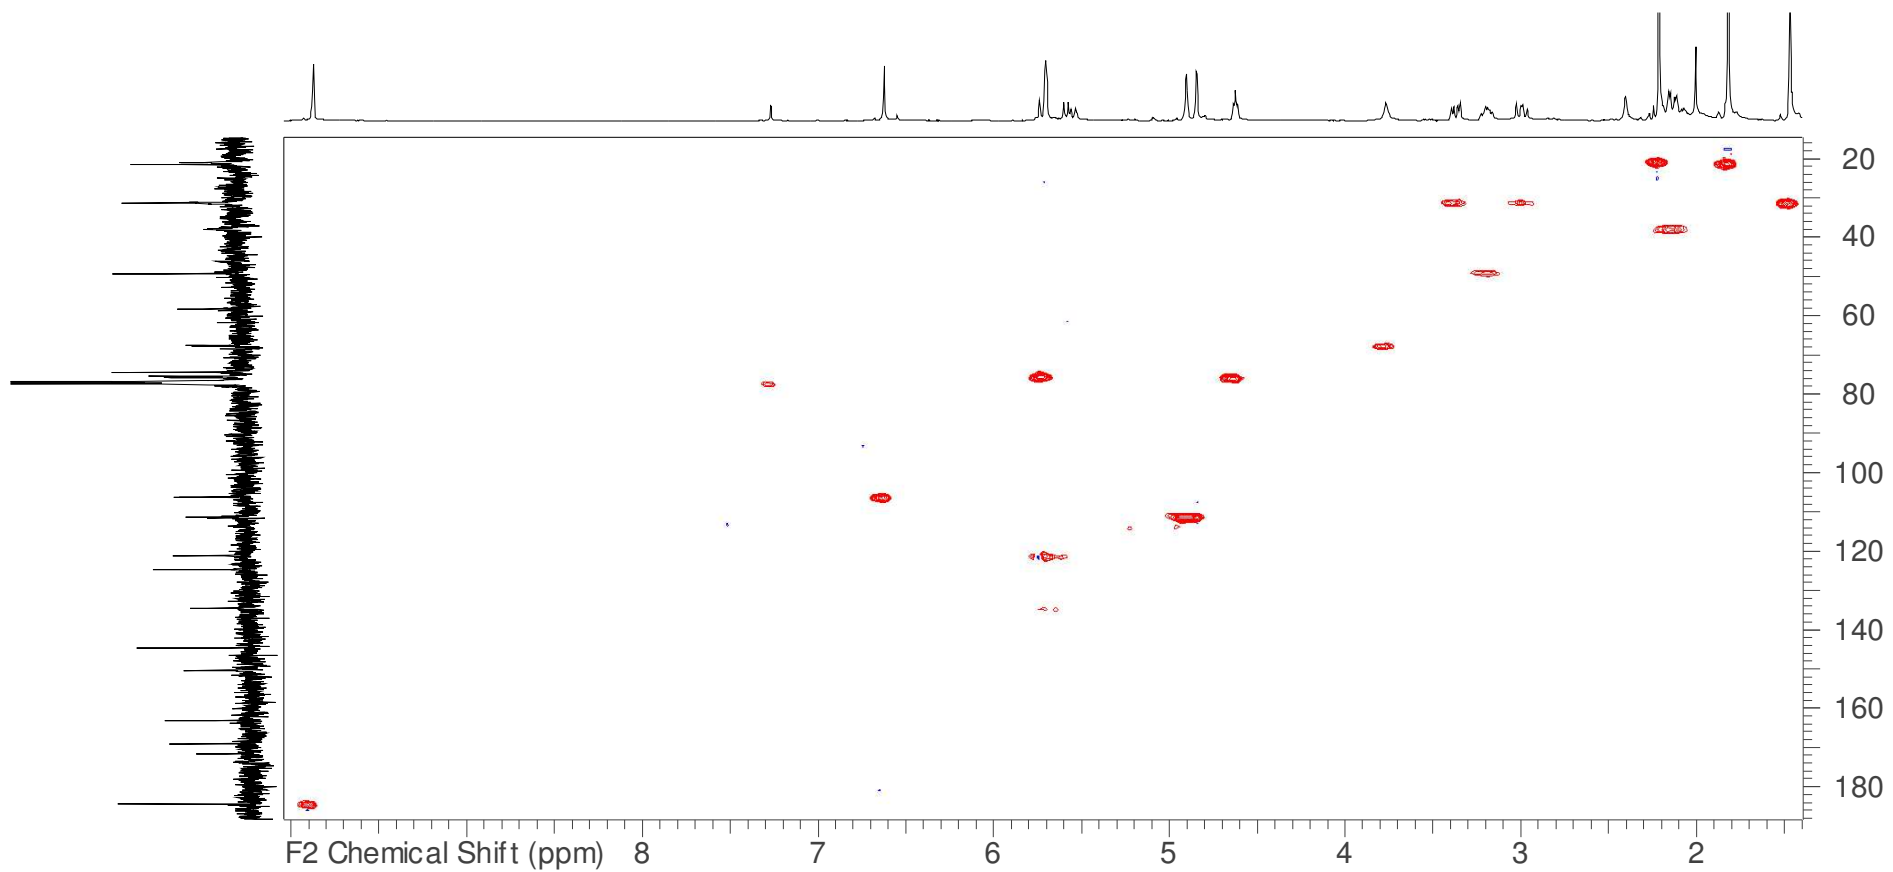

Figure S21. gHMOC of keikipukalide D (4) in CDCl<sub>3</sub>, 400 MHz

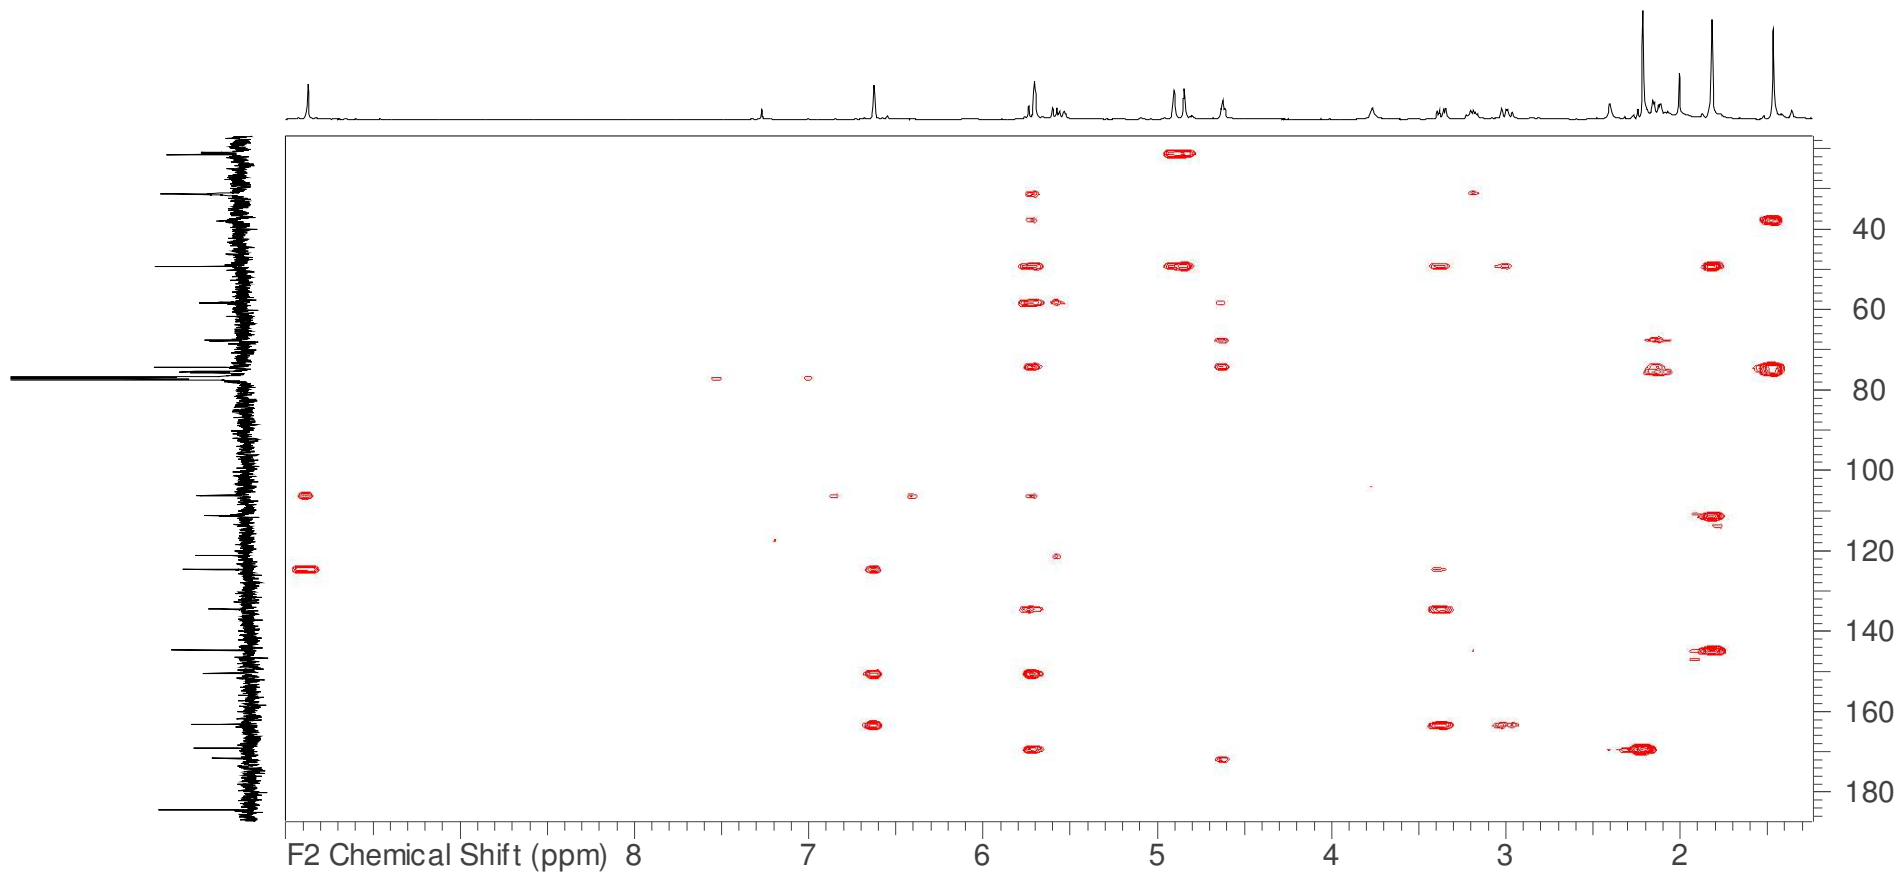

Figure S22. gHMBC of keikipukalide D (**4**) in CDCl<sub>3</sub>, 400 MHz



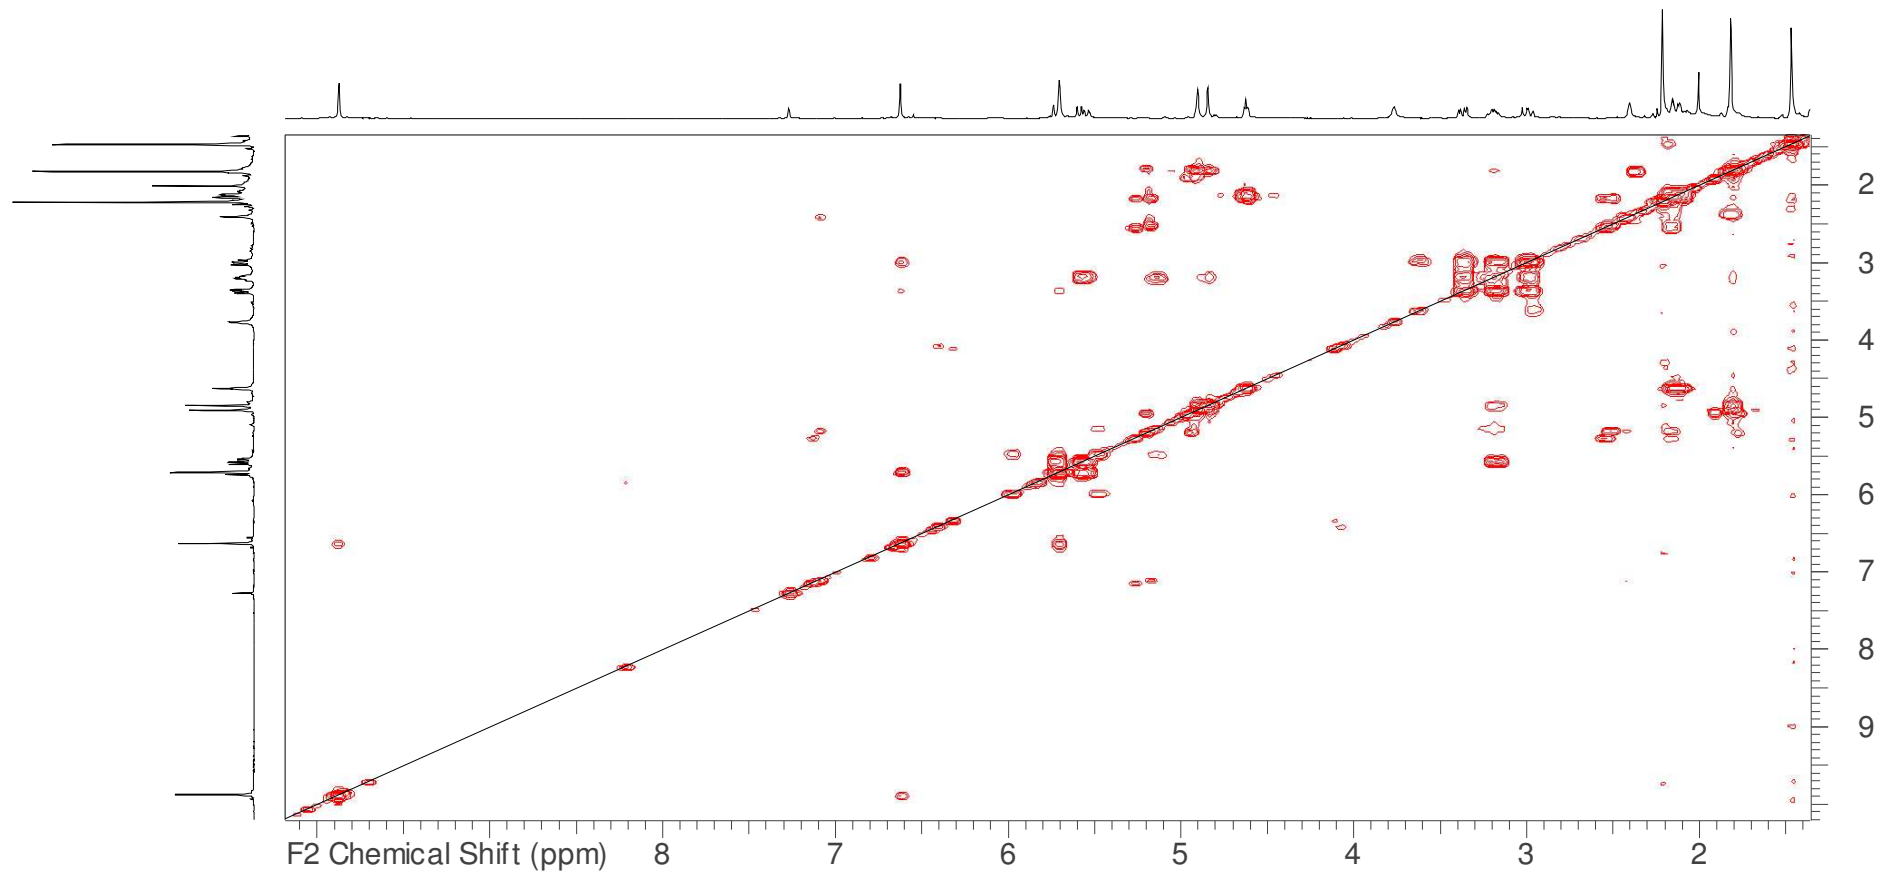

Figure S23. gCOSY of keikipukalide D (**4**) in CDCl<sub>3</sub>, 500 MHz

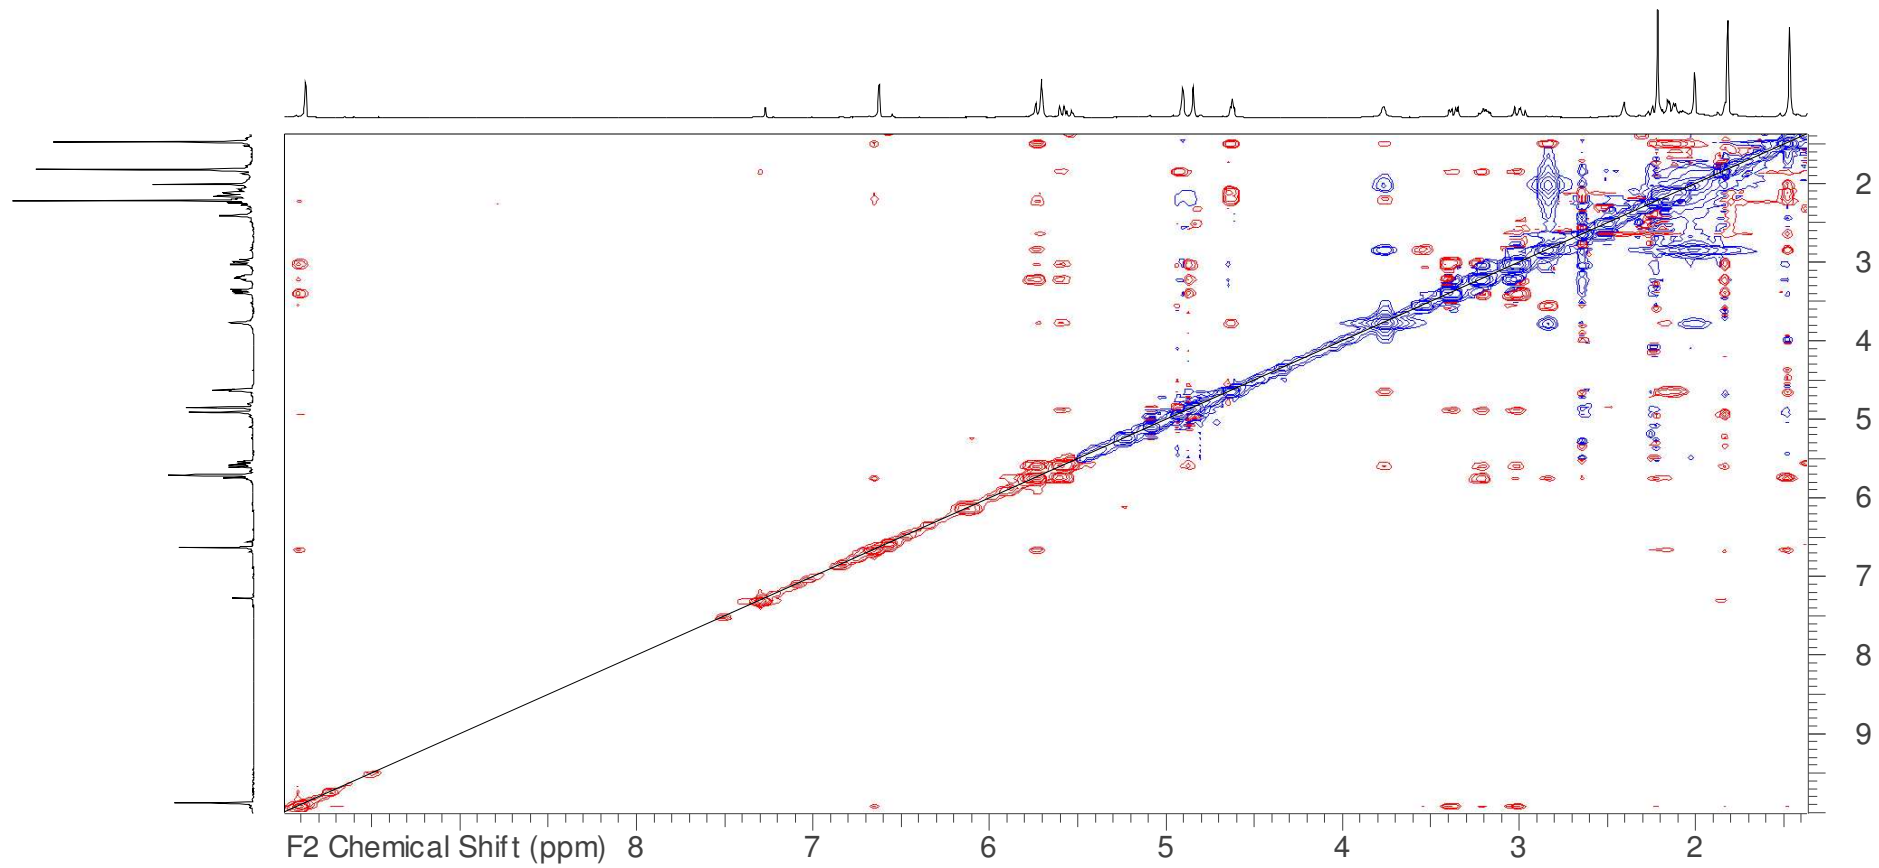

Figure S24. NOESY of keikipukalide D (**4**) in CDCl<sub>3</sub>, 500 MHz

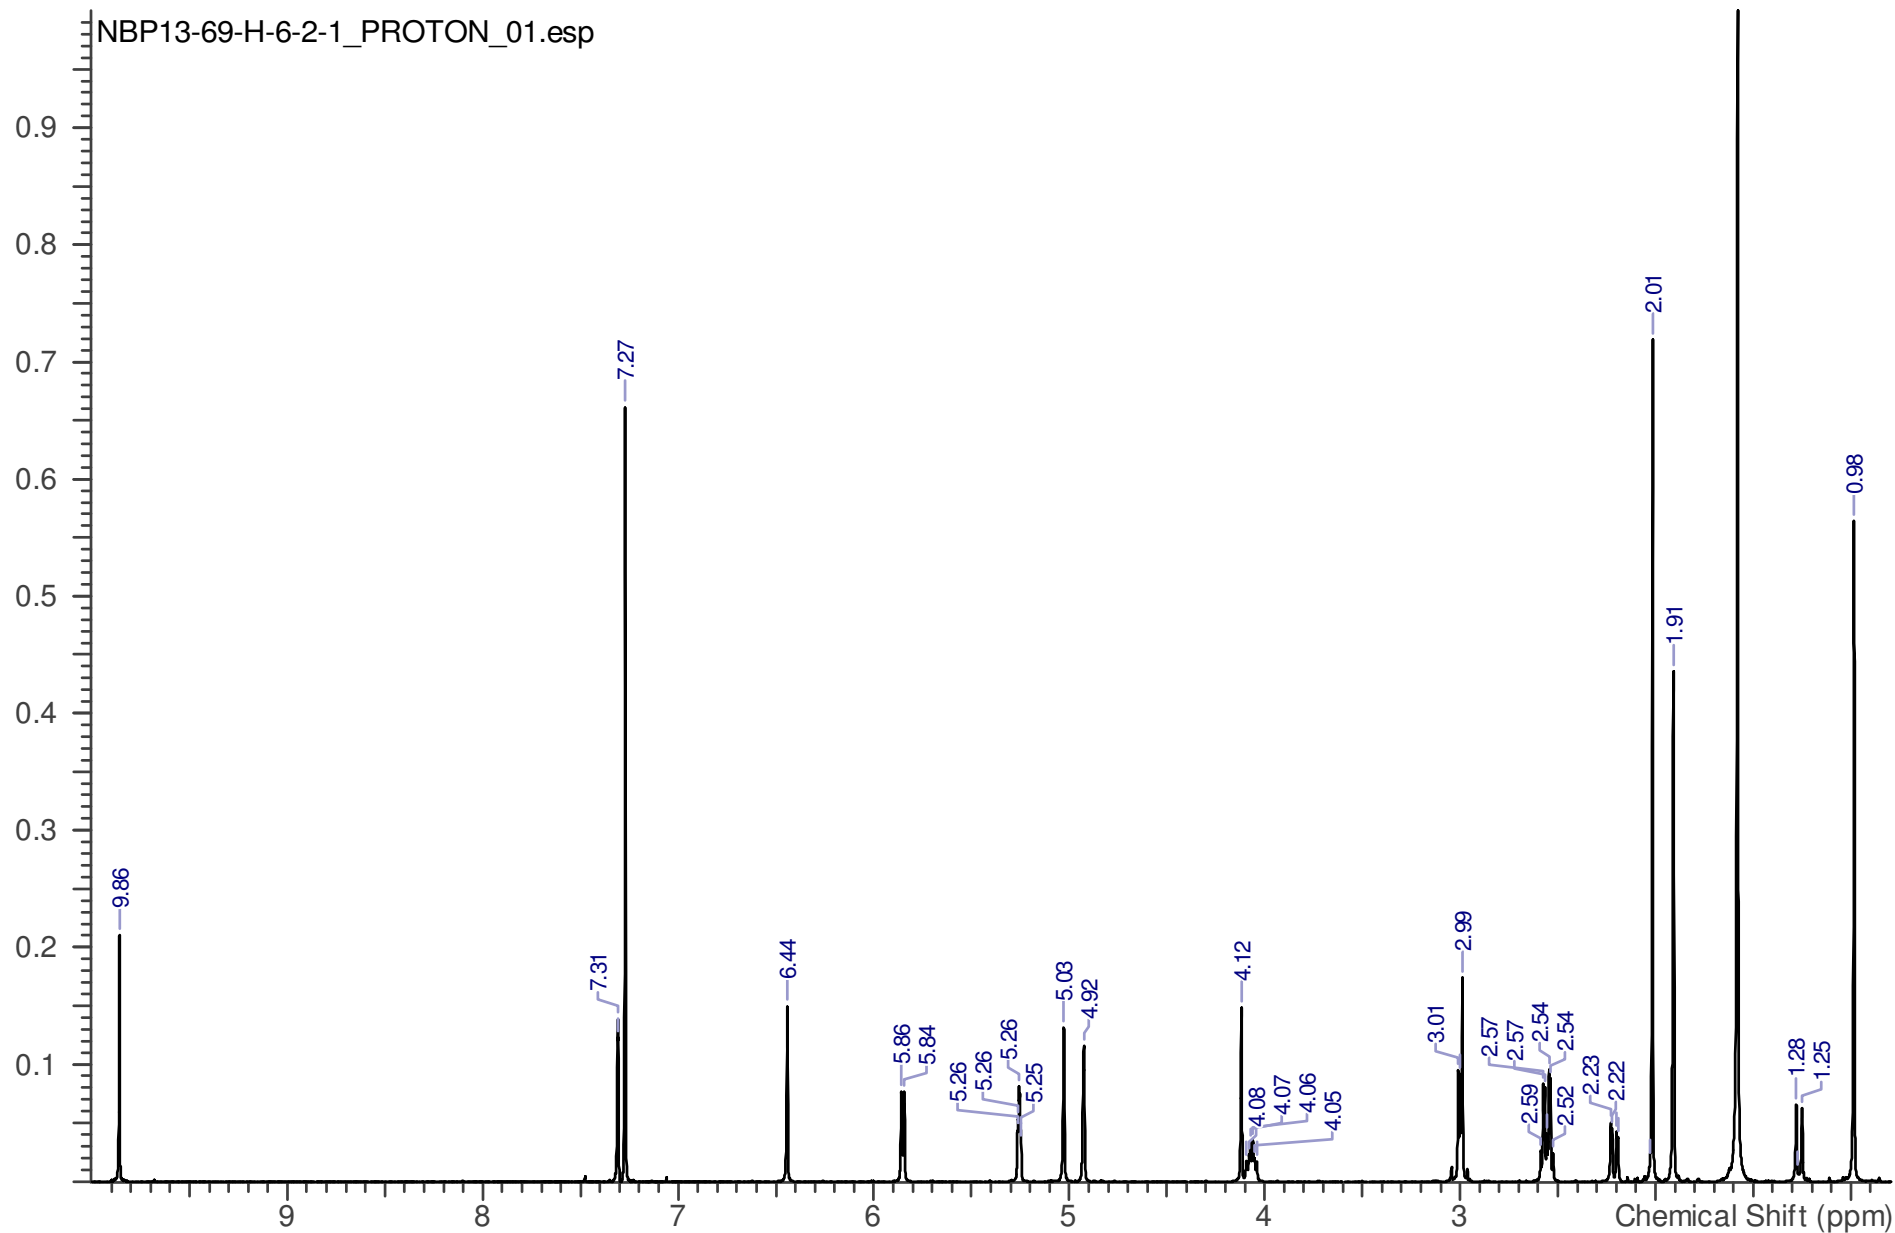

Figure S25.  $^1\text{H}$  NMR spectrum of keikipukalide E (**5**) in  $\text{CDCl}_3$ , 500 MHz; 1.58 ppm is the water signal.

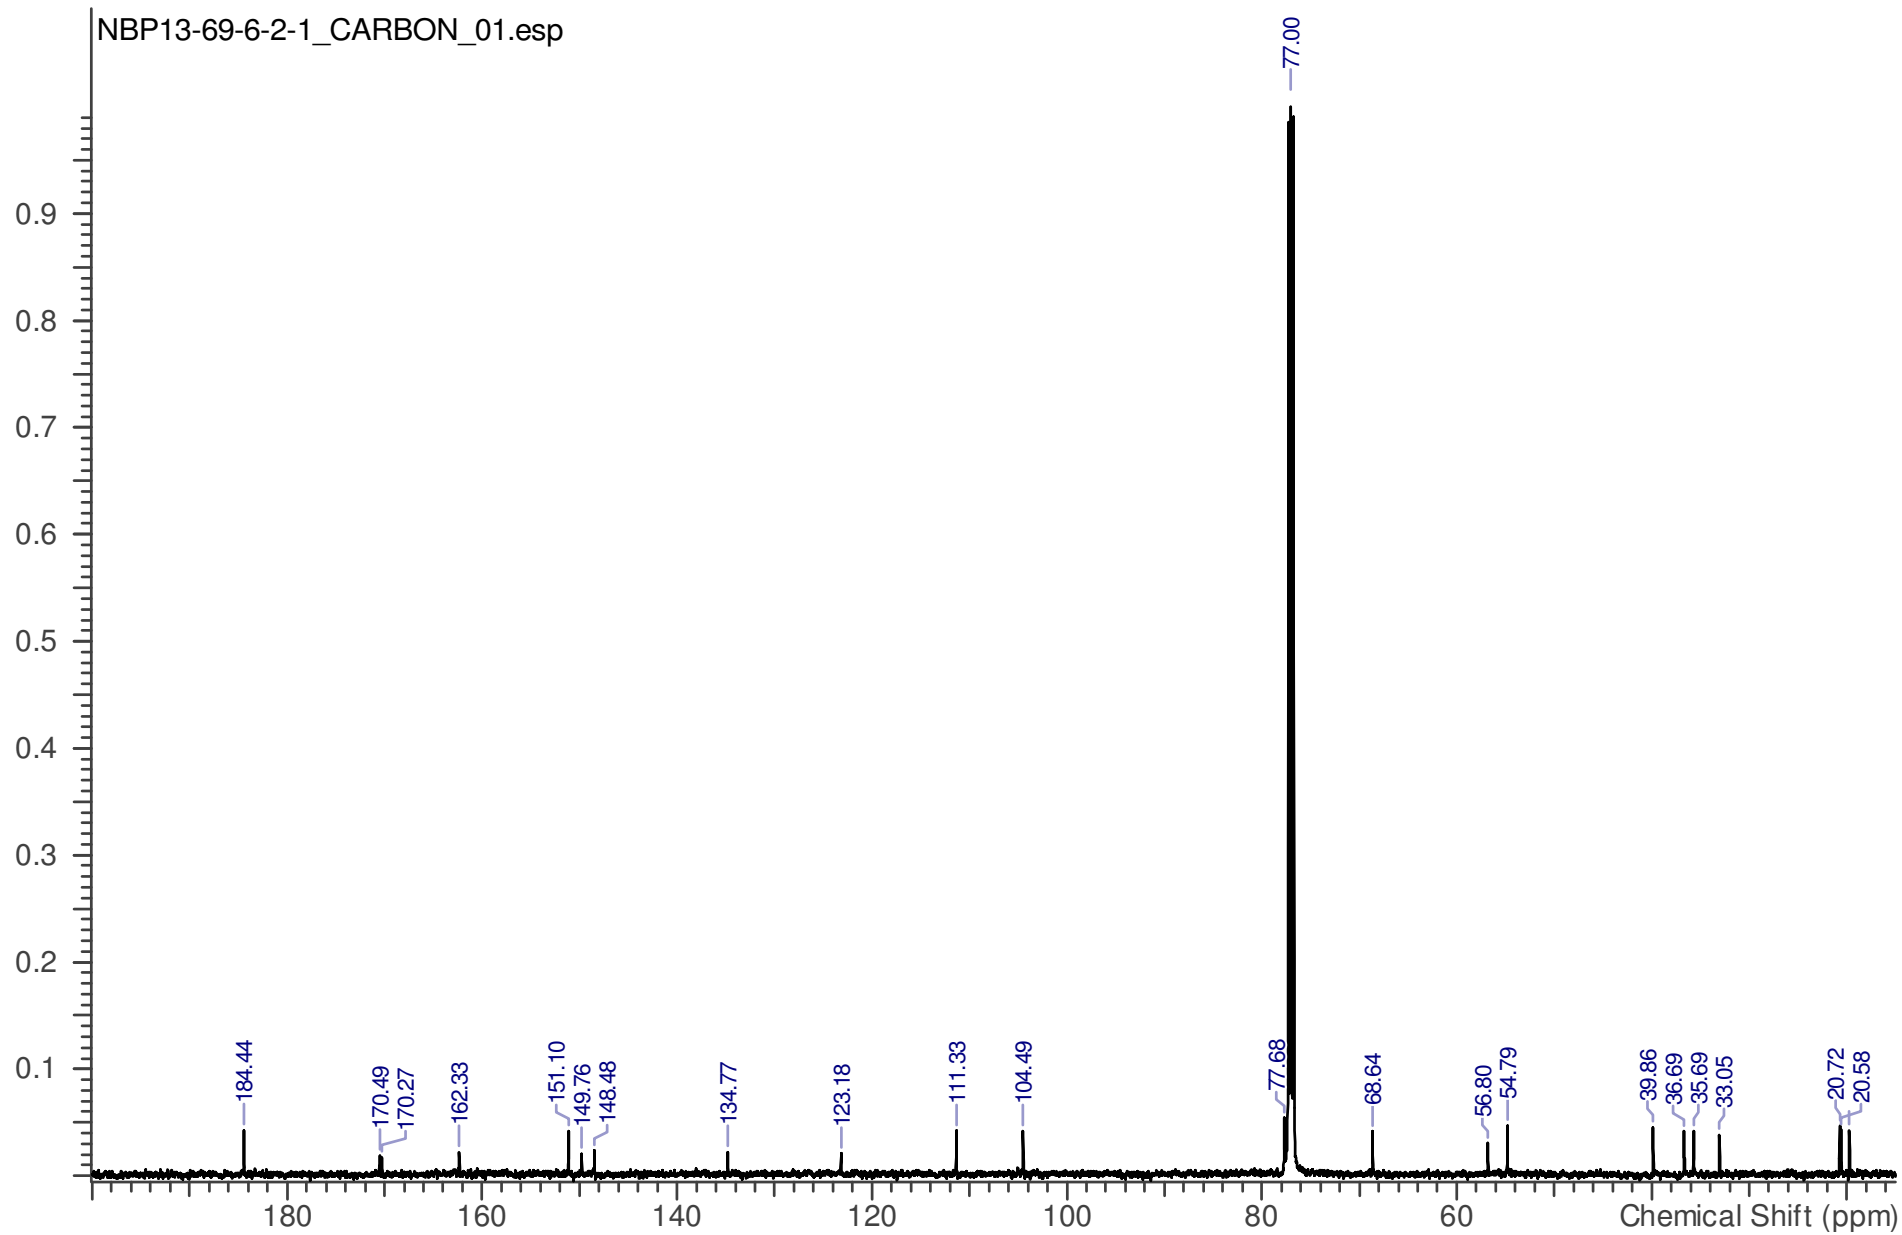

Figure S26.  $^{13}\text{C}$  NMR spectrum of keikipukalide E (**5**) in  $\text{CDCl}_3$ , 125 MHz

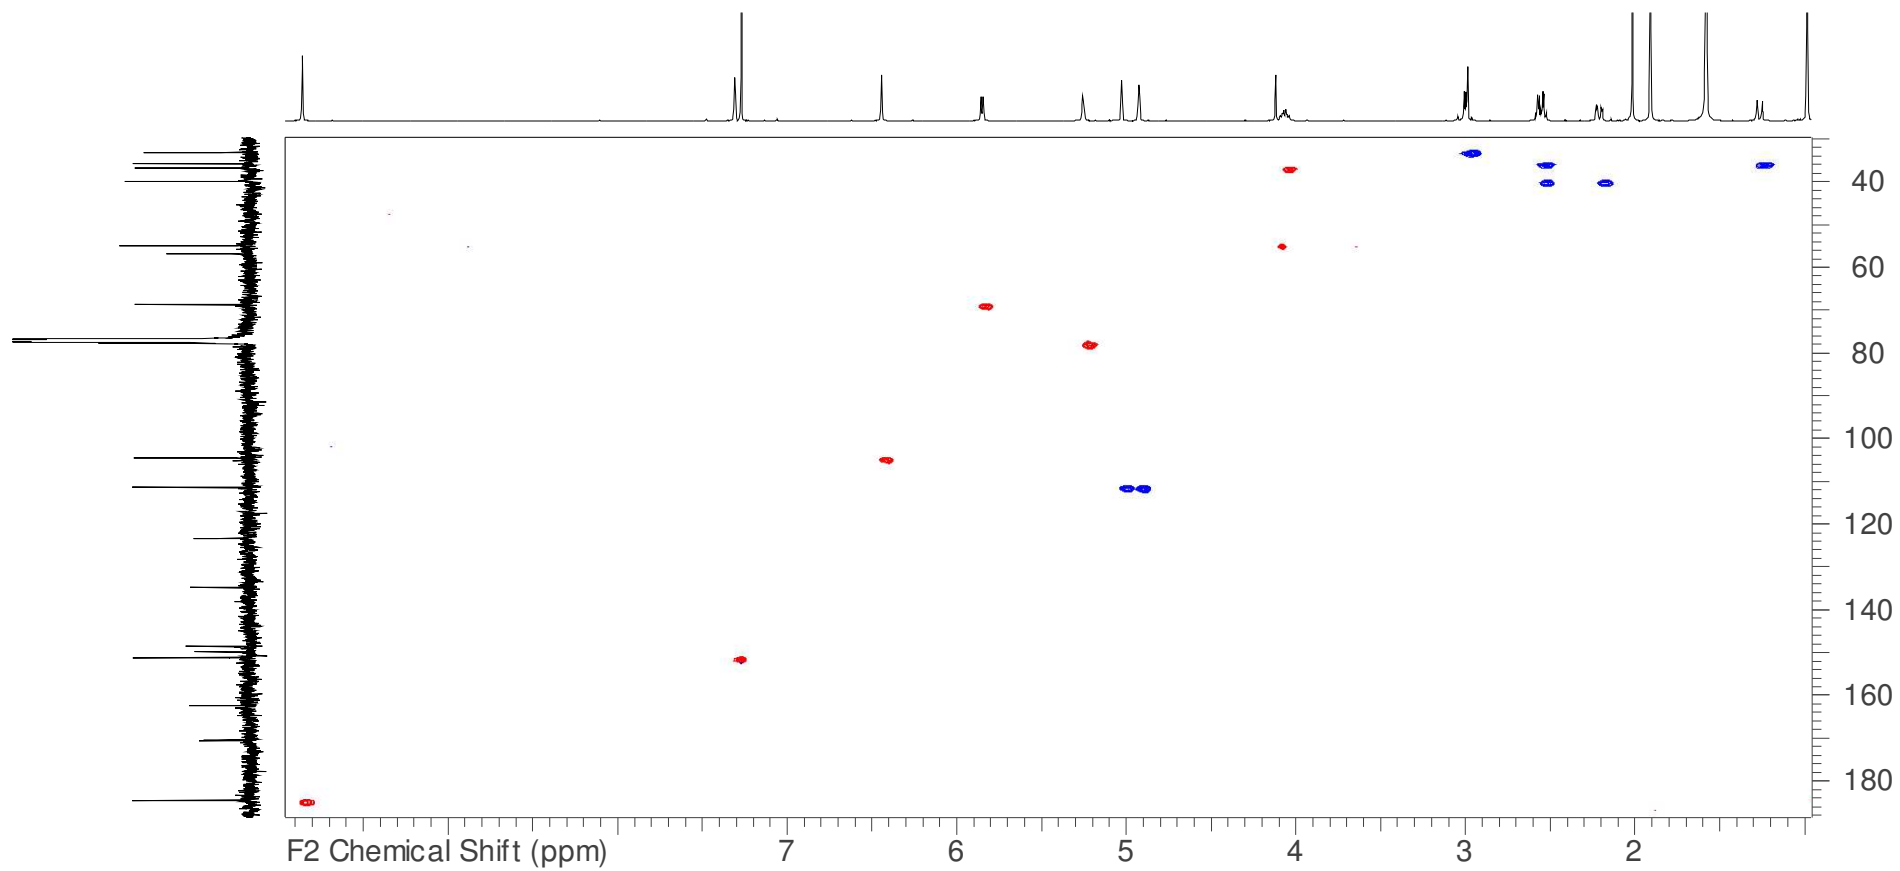

Figure S27. gHSQC of keikipukalide E (**5**) in CDCl<sub>3</sub>, 600 MHz

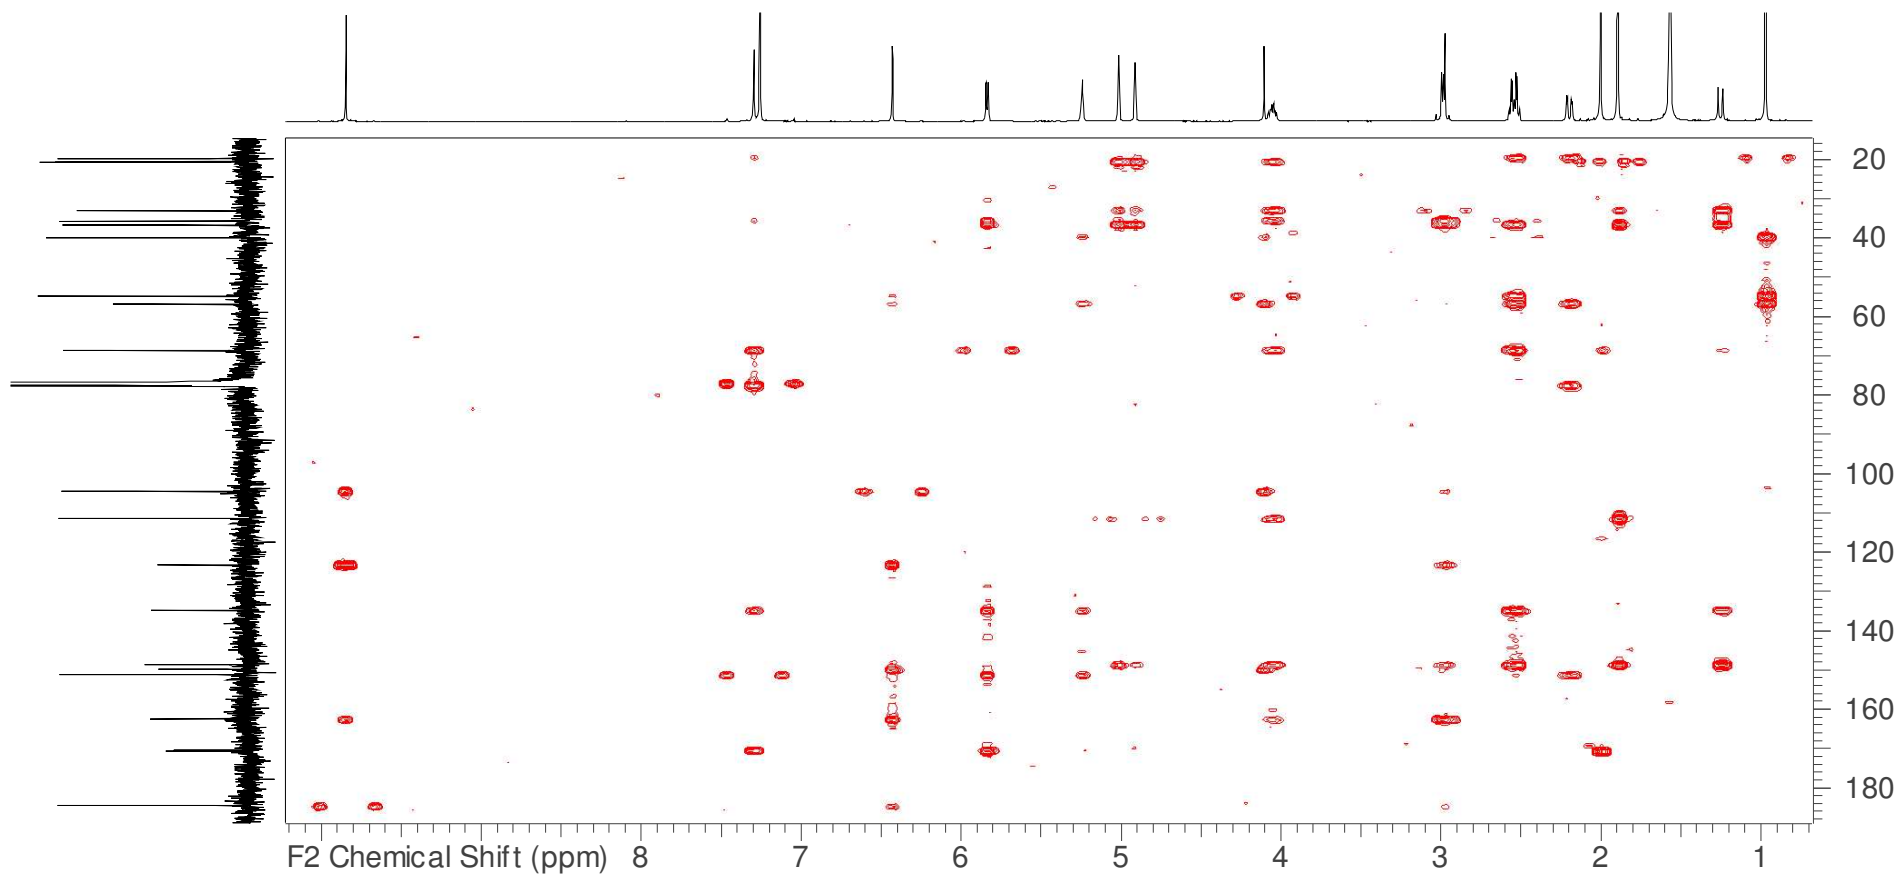

Figure S28. gHMBC of keikipukalide E (**5**) in CDCl<sub>3</sub>, 500 MHz

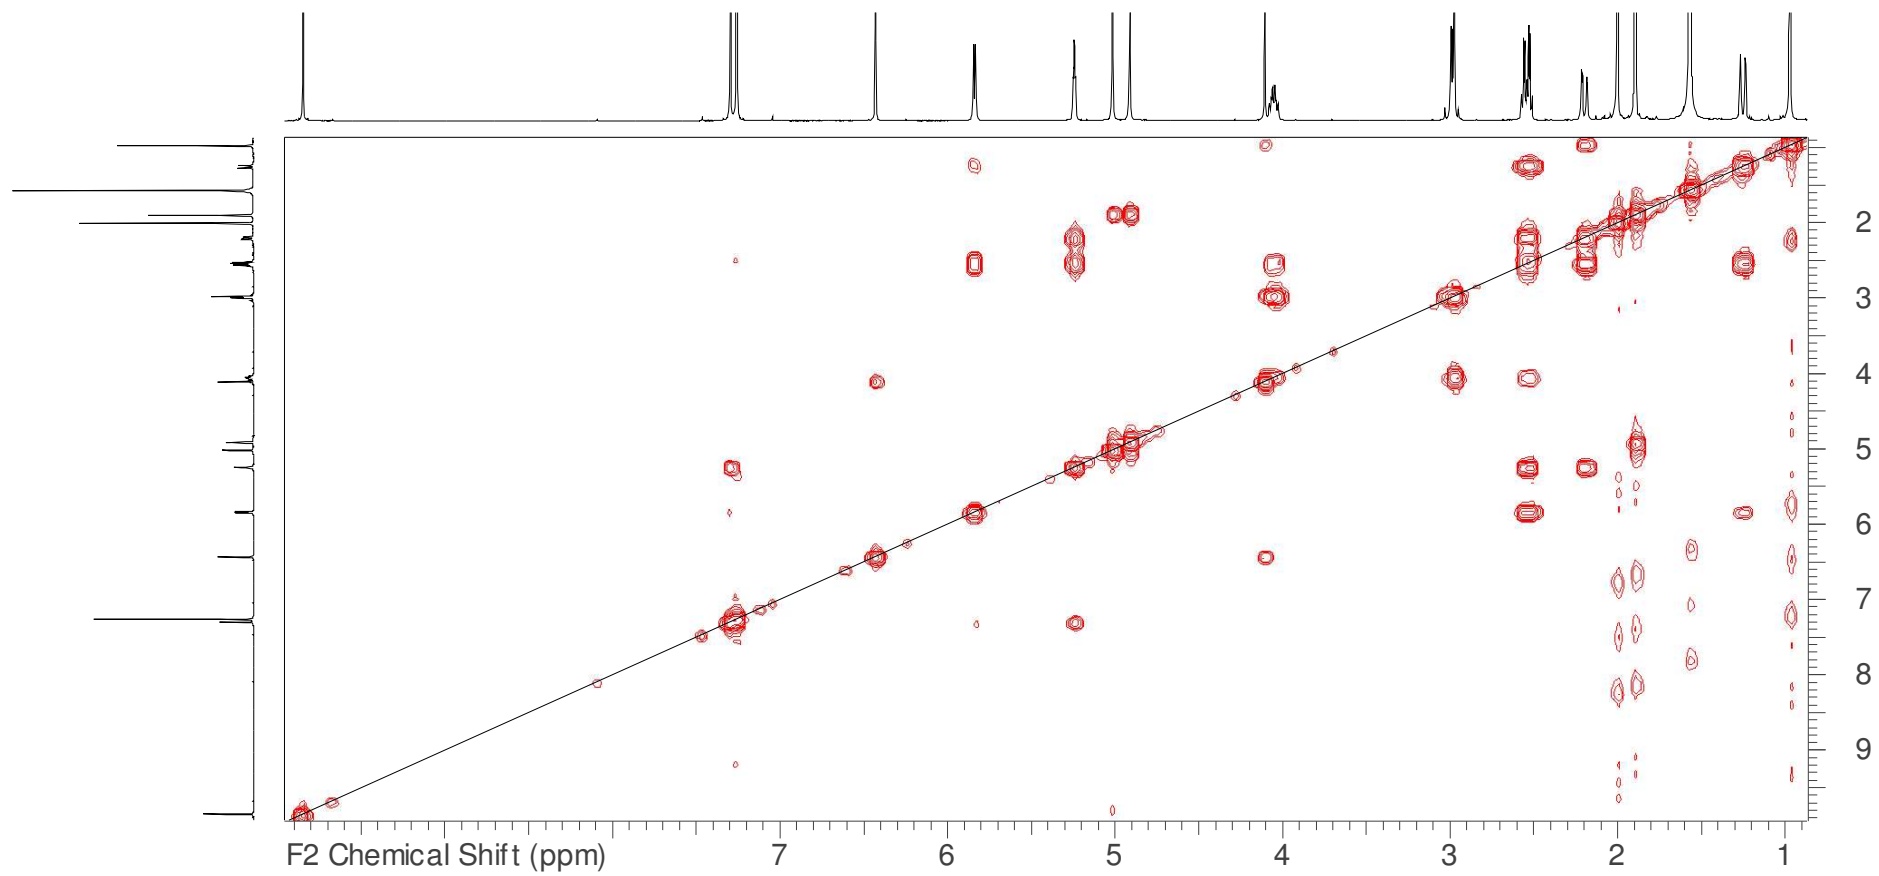

Figure S29. gCOSY of keikipukalide E (**5**) in CDCl<sub>3</sub>, 500 MHz

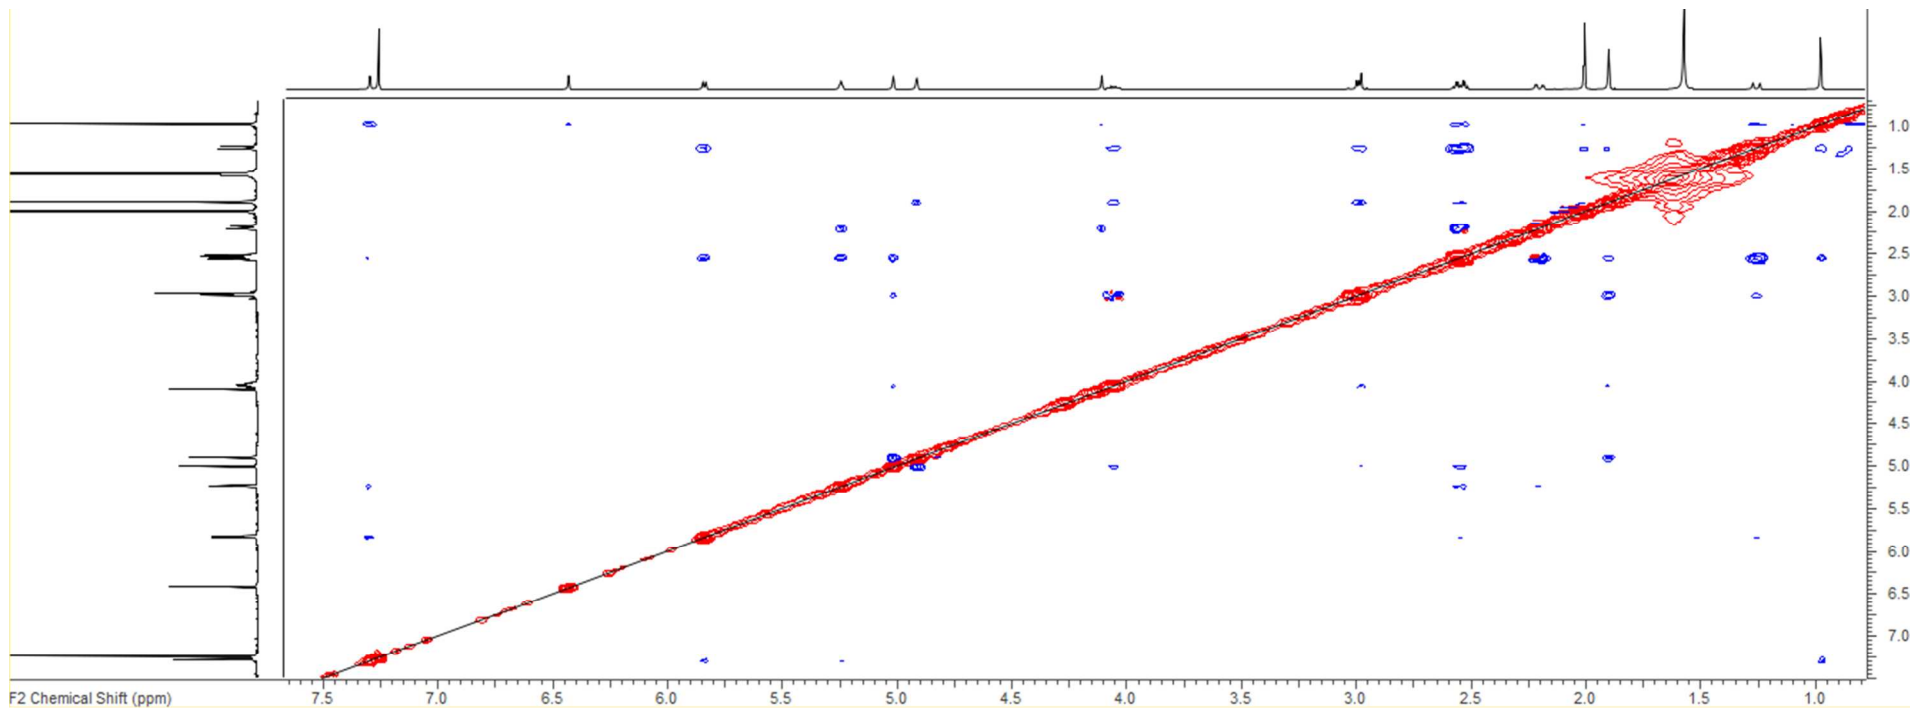

Figure S30. NOESY of keikipukalide E (**5**) in CDCl<sub>3</sub>, 500 MHz



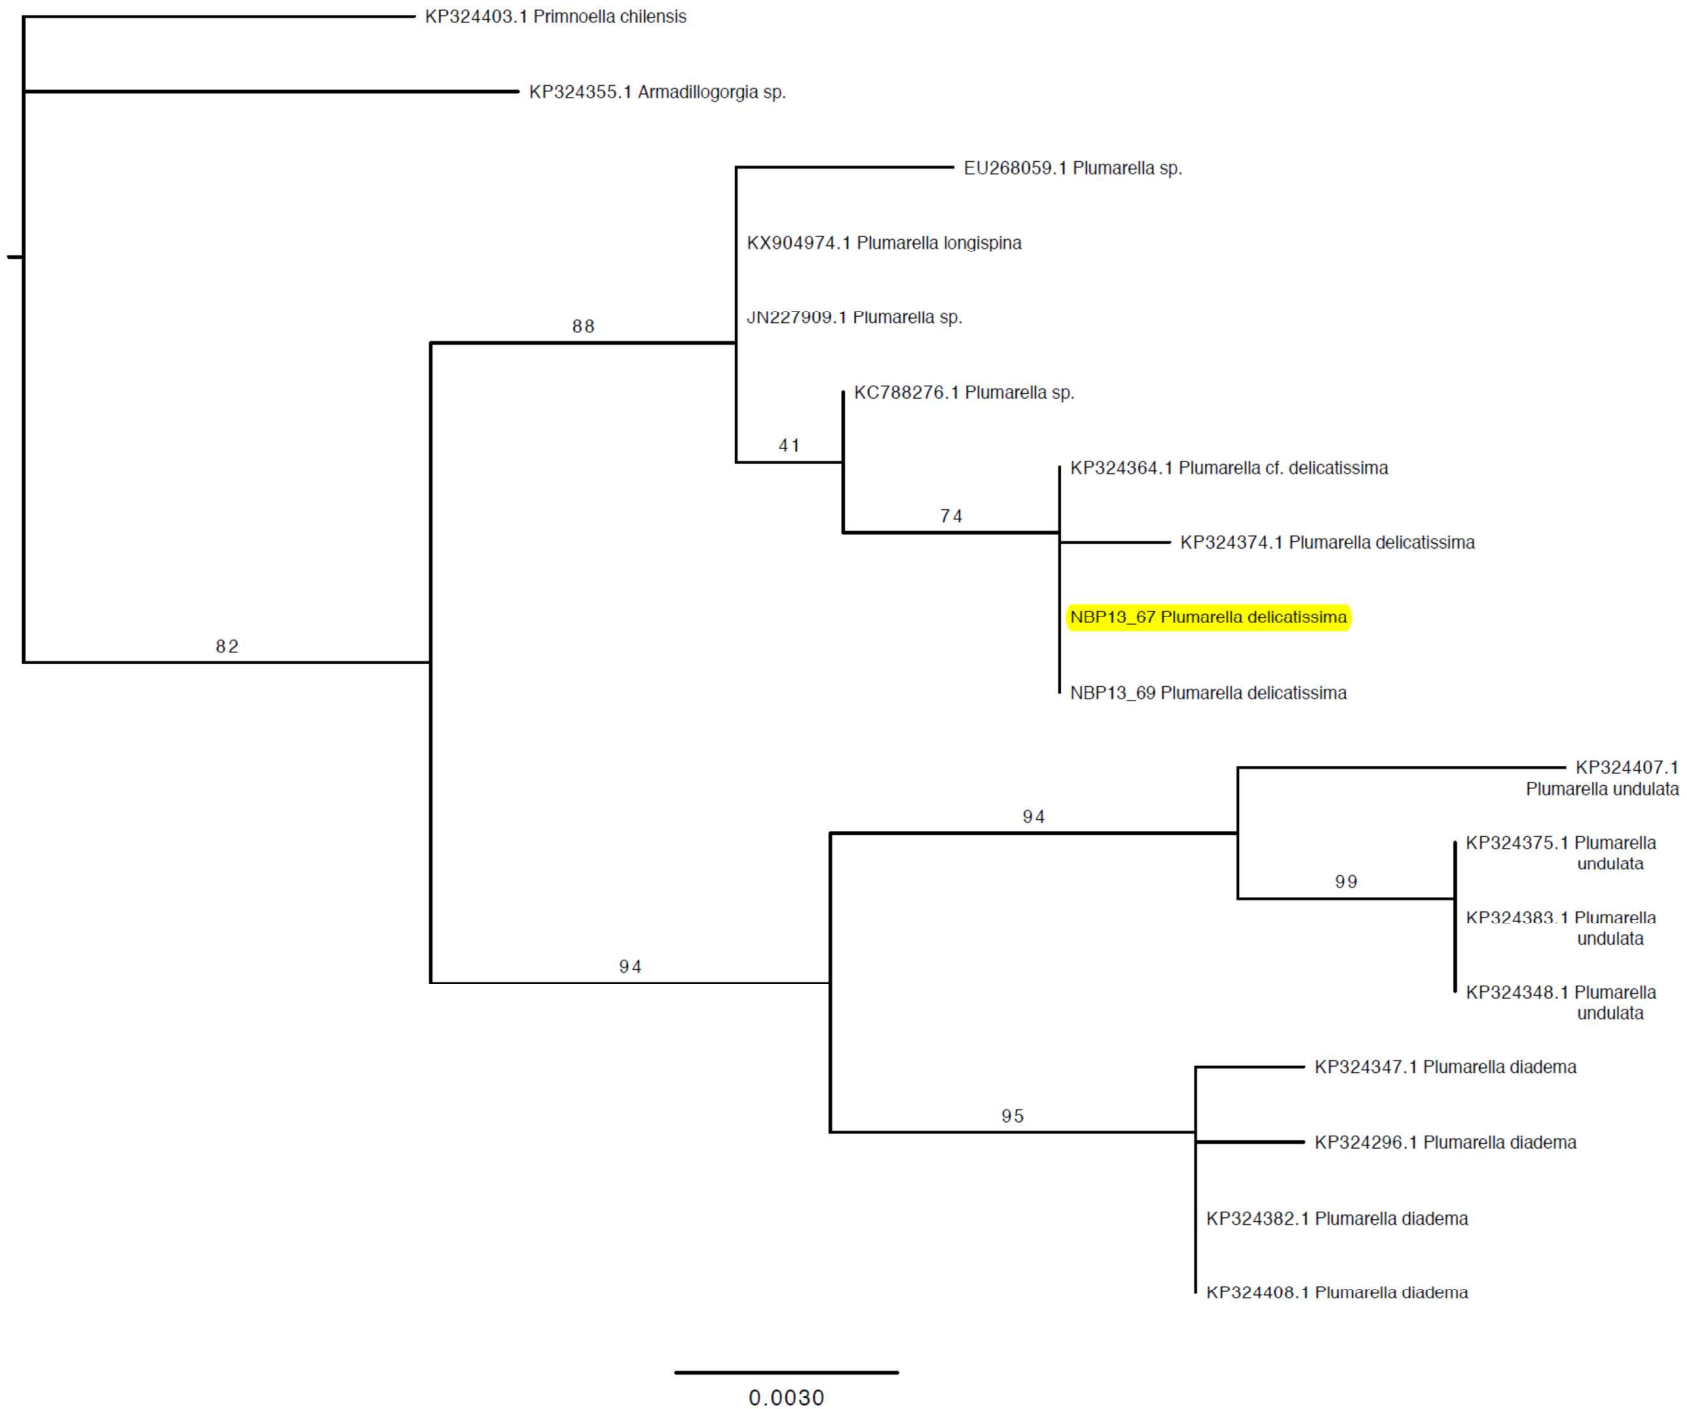

Figure S31. Maximum Likelihood tree topology comparing our *Plumarella* *msh1* sequences with those available on Genbank

Table S1. Crystal Data and Structure Refinement for Keikipukalide A (1).

|                                             |                                                               |
|---------------------------------------------|---------------------------------------------------------------|
| Identification code                         | JAX_F2_3                                                      |
| Empirical formula                           | C <sub>20</sub> H <sub>20</sub> O <sub>6</sub>                |
| Formula weight                              | 356.36                                                        |
| Temperature/K                               | 100.0                                                         |
| Crystal system                              | orthorhombic                                                  |
| Space group                                 | P2 <sub>1</sub> 2 <sub>1</sub> 2 <sub>1</sub>                 |
| a/Å                                         | 6.74700(10)                                                   |
| b/Å                                         | 13.2449(3)                                                    |
| c/Å                                         | 18.8700(4)                                                    |
| α/°                                         | 90                                                            |
| β/°                                         | 90                                                            |
| γ/°                                         | 90                                                            |
| Volume/Å <sup>3</sup>                       | 1686.29(6)                                                    |
| Z                                           | 4                                                             |
| ρ <sub>calc</sub> /g/cm <sup>3</sup>        | 1.404                                                         |
| μ/mm <sup>-1</sup>                          | 0.862                                                         |
| F(000)                                      | 752.0                                                         |
| Crystal size/mm <sup>3</sup>                | 0.14 × 0.07 × 0.02                                            |
| Radiation                                   | CuKα (λ = 1.54178)                                            |
| 2θ range for data collection/               | 8.156 to 154.438                                              |
| Index ranges                                | -8 ≤ h ≤ 8, -15 ≤ k ≤ 16, -23 ≤ l ≤ 23                        |
| Reflections collected                       | 25739                                                         |
| Independent reflections                     | 3552 [R <sub>int</sub> = 0.0710, R <sub>sigma</sub> = 0.0356] |
| Data/restraints/parameters                  | 3552/0/249                                                    |
| Goodness-of-fit on F <sup>2</sup>           | 1.048                                                         |
| Final R indexes [I ≥ 2σ (I)]                | R <sub>1</sub> = 0.0352, wR <sub>2</sub> = 0.0698             |
| Final R indexes [all data]                  | R <sub>1</sub> = 0.0433, wR <sub>2</sub> = 0.0731             |
| Largest diff. peak/hole / e Å <sup>-3</sup> | 0.19/-0.18                                                    |
| Flack parameter                             | 0.17(10)                                                      |

Table S2. Results Bijvoet-Pair Analysis and Bayesian Statistics for Keikipukalide A (1).

|                       |                           |
|-----------------------|---------------------------|
| Space Group P212121   | Student-T Prob. Plot      |
| Wavelength 1.54178    | Sample Size. 1478         |
| Flack x .... 0.17(10) | Corr. Coeff. 0.999        |
| Parsons z .. 0.20(10) | Intercept .. 0.016        |
|                       | Slope ..... 0.890         |
|                       |                           |
| Bijvoet Pairs 1488    | Bayesian Statistics       |
| Coverage ... 99       | Student_T Nu 100          |
| DiffCalcMax. 33.52    | Select Pairs 1488         |
| Outlier Crit 67.04    | Theta_Min .. 7.73         |
| Scatter Plot          | Theta_Max .. 76.85        |
| Sigma Crit.. 0.25     | <b>P2(true).... 1.000</b> |
| Select Pairs 106      | P3(true).... 0.981        |
| Number Plus 69        | P3(rac-twin) 0.019        |
| Number Minus 37       | P3(false) .. 0.4E-17      |
| Slope ..... 0.902     | G ..... 0.6231            |
|                       | G (su) ..... 0.1761       |
|                       | Hooft y ... 0.19(9)       |

Table S3. Crystal Data and Structure Refinement for Keikipukalide E (5).

|                                             |                                                               |
|---------------------------------------------|---------------------------------------------------------------|
| Identification code                         | NBP13_69_H_6_3                                                |
| Empirical formula                           | C <sub>22</sub> H <sub>24</sub> O <sub>7</sub>                |
| Formula weight                              | 400.41                                                        |
| Temperature/K                               | 100                                                           |
| Crystal system                              | orthorhombic                                                  |
| Space group                                 | P2 <sub>1</sub> 2 <sub>1</sub> 2 <sub>1</sub>                 |
| a/Å                                         | 8.7671(2)                                                     |
| b/Å                                         | 11.4162(3)                                                    |
| c/Å                                         | 19.4875(4)                                                    |
| α/°                                         | 90                                                            |
| β/°                                         | 90                                                            |
| γ/°                                         | 90                                                            |
| Volume/Å <sup>3</sup>                       | 1950.44(8)                                                    |
| Z                                           | 4                                                             |
| ρ <sub>calc</sub> /cm <sup>3</sup>          | 1.364                                                         |
| μ/mm <sup>-1</sup>                          | 0.845                                                         |
| F(000)                                      | 848.0                                                         |
| Crystal size/mm <sup>3</sup>                | 0.31 × 0.116 × 0.03                                           |
| Radiation                                   | CuKα (λ = 1.54178)                                            |
| 2θ range for data collection/°              | 8.978 to 154.788                                              |
| Index ranges                                | -11 ≤ h ≤ 10, -14 ≤ k ≤ 14, -24 ≤ l ≤ 24                      |
| Reflections collected                       | 29803                                                         |
| Independent reflections                     | 4102 [R <sub>int</sub> = 0.0664, R <sub>sigma</sub> = 0.0323] |
| Data/restraints/parameters                  | 4102/0/273                                                    |
| Goodness-of-fit on F <sup>2</sup>           | 1.031                                                         |
| Final R indexes [I ≥ 2σ (I)]                | R <sub>1</sub> = 0.0344, wR <sub>2</sub> = 0.0782             |
| Final R indexes [all data]                  | R <sub>1</sub> = 0.0401, wR <sub>2</sub> = 0.0812             |
| Largest diff. peak/hole / e Å <sup>-3</sup> | 0.19/-0.18                                                    |
| Flack parameter                             | 0.02(8)                                                       |

Table S4. Results Bijvoet-Pair Analysis and Bayesian Statistics for Keikipukalide E (5).

|                      |                           |
|----------------------|---------------------------|
| Space Group P212121  | Student-T Prob. Plot      |
| Wavelength 1.54178   | Sample Size. 1734         |
| Flack x .... 0.02(8) | Corr. Coeff. 0.999        |
| Parsons z .. 0.04(8) | Intercept .. -0.029       |
|                      | Slope ..... 0.890         |
|                      |                           |
| Bijvoet Pairs 1744   | Bayesian Statistics       |
| Coverage ... 98      | Student_T Nu 100          |
| DiffCalcMax. 38.60   | Select Pairs 1744         |
| Outlier Crit 77.21   | Theta_Min .. 6.76         |
| Scatter Plot         | Theta_Max .. 77.26        |
| Sigma Crit.. 0.25    | <b>P2(true).... 1.000</b> |
| Select Pairs 151     | P3(true).... 1.000        |
| Number Plus 94       | P3(rac-twin) 0.9E-09      |
| Number Minus 57      | P3(false) .. 0.9E-38      |
| Slope ..... 1.030    | G ..... 0.9530            |
|                      | G (su) ..... 0.1473       |
|                      | Hooft y ... 0.02(7)       |
